# Supplementary material for: Characterization of Haartman Institute snake virus-1 (HISV-1) and HISV-like viruses—The representatives of genus Hartmanivirus, family Arenaviridae
Source: PubMed Central journal article supplement (PMC6261641; doi:10.1371/journal.ppat.1007415), 2018-11-14

A) Coverage of HISV-1 (pure isolate) and HISV-2, snake 1.4 (table 1).

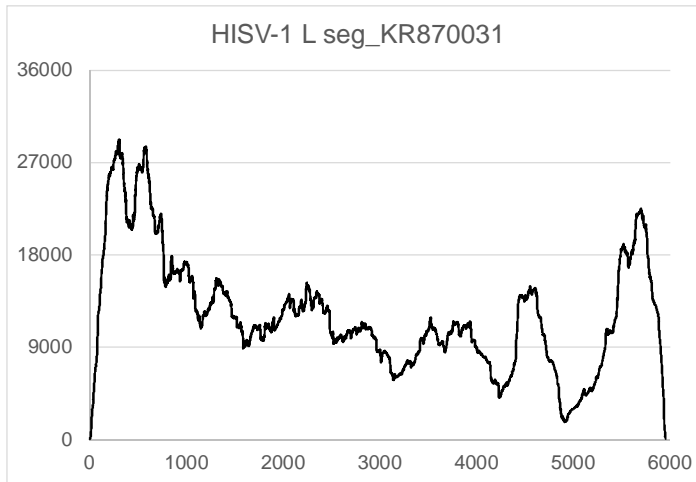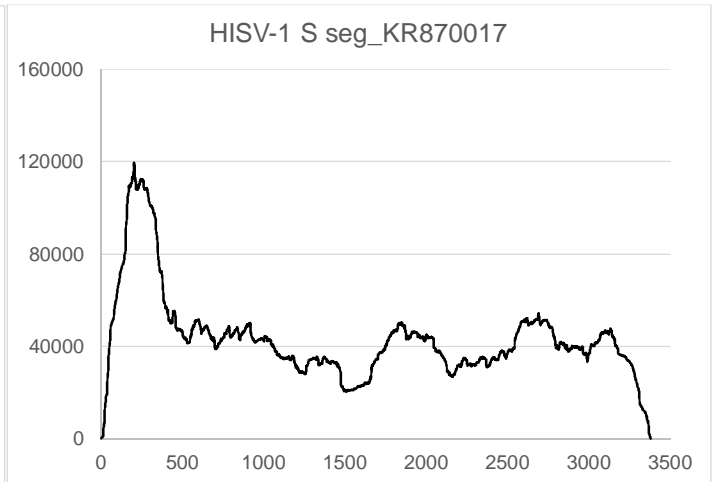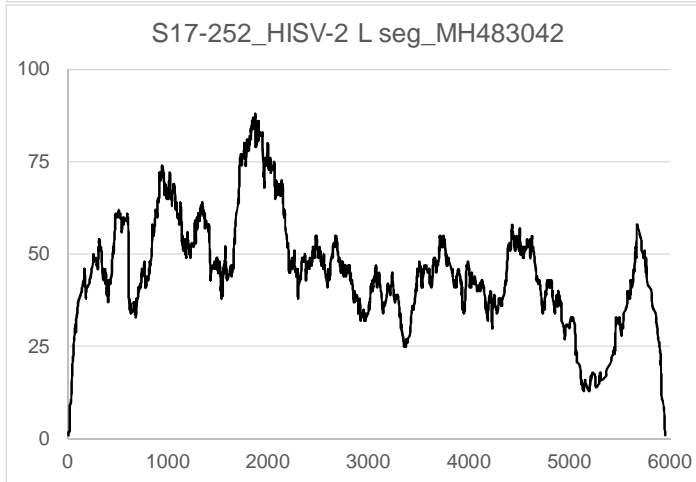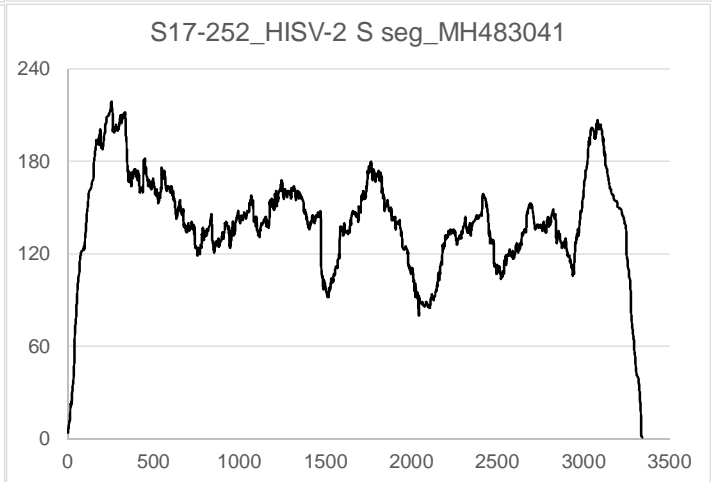

**B)** Coverages of VPZV-1 L and S segments, snakes 2.1, 2.2, 2.3, 2.5, 2.6 and 2.7 (table 1).

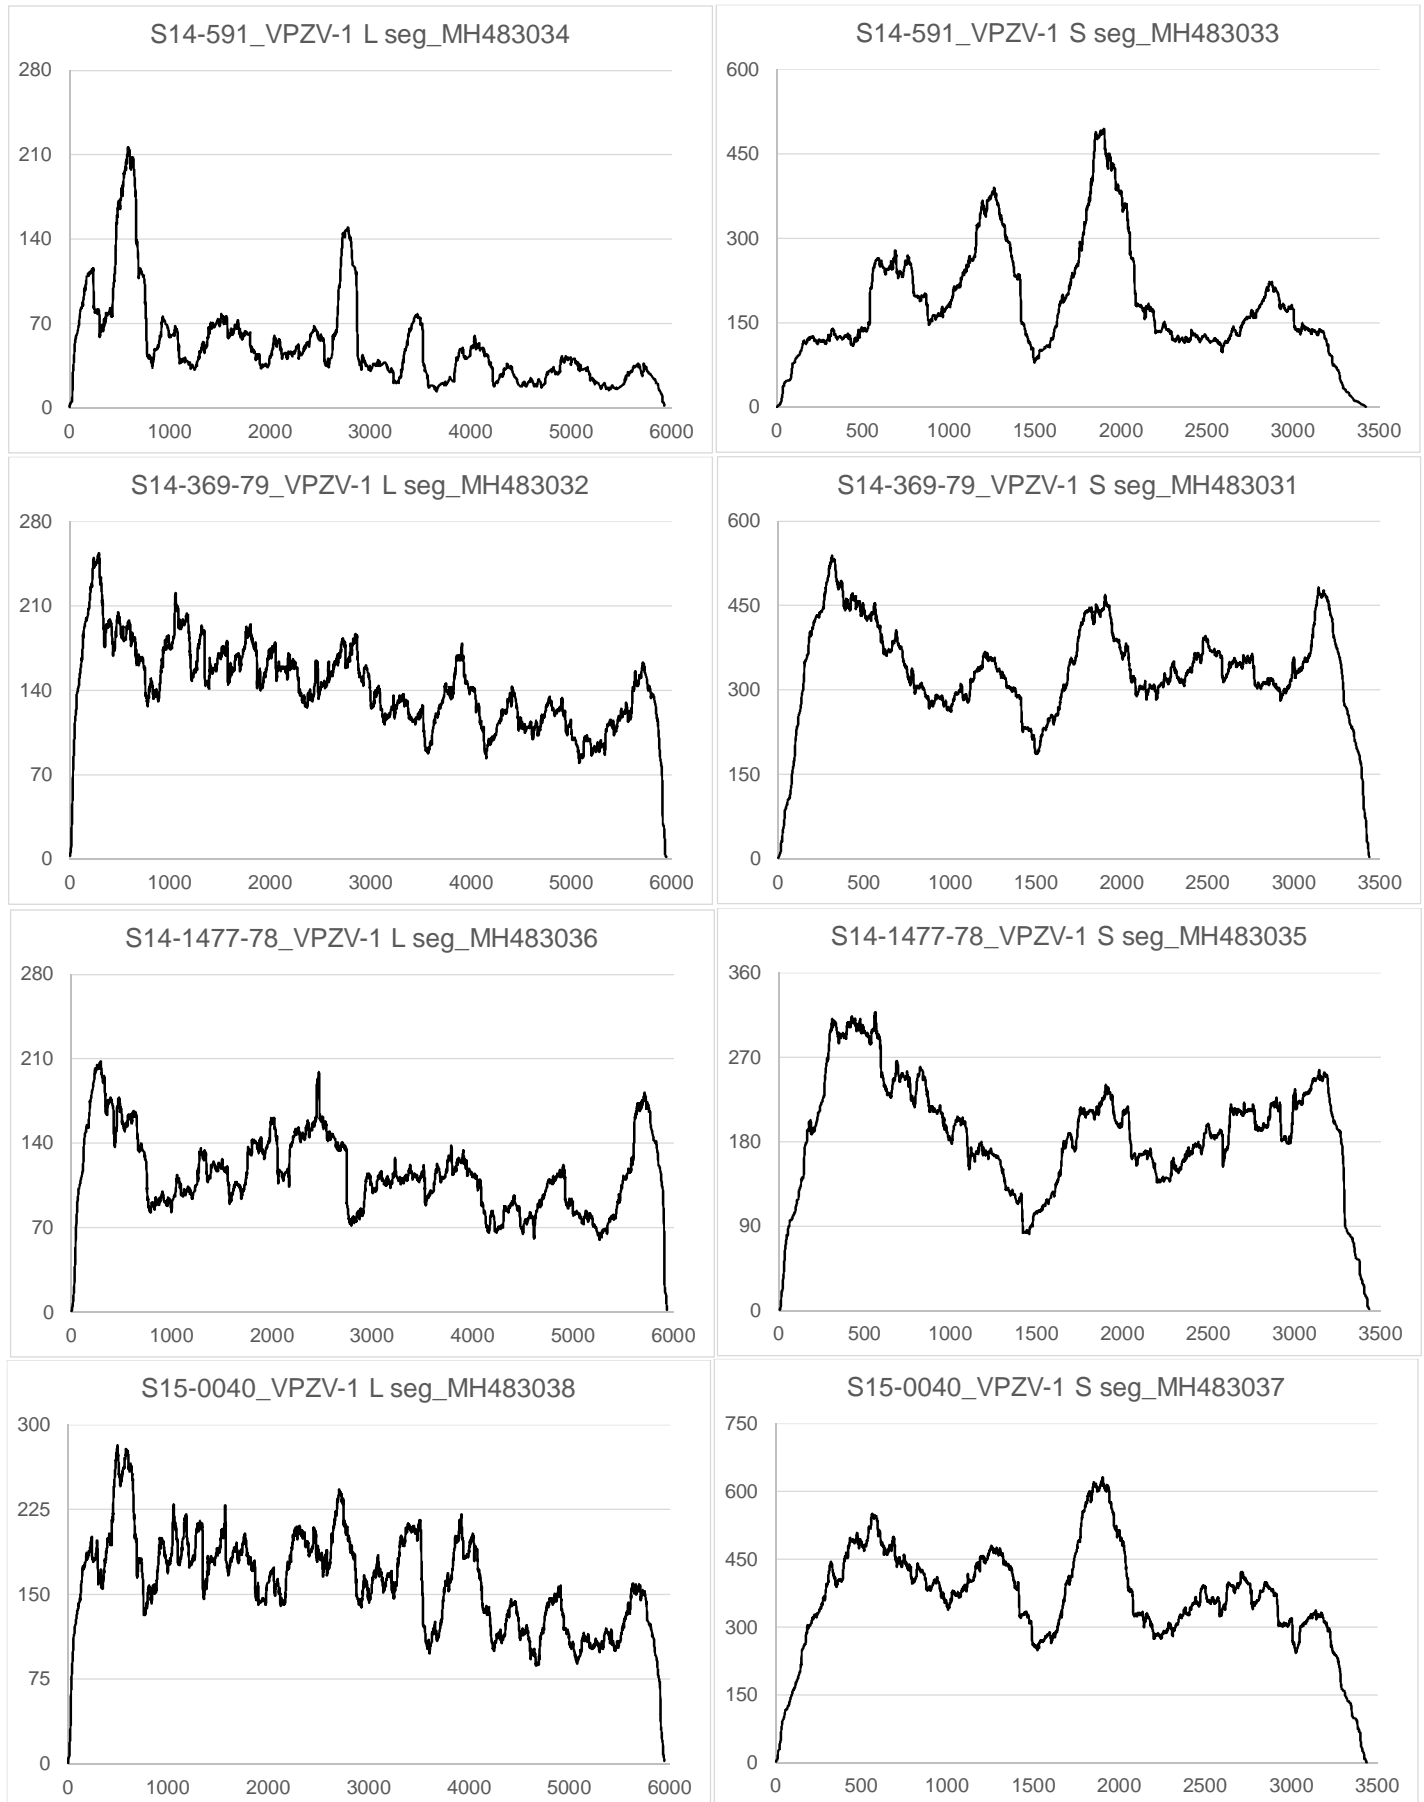

S17-172\_VPZV-1 L seg\_MH483040

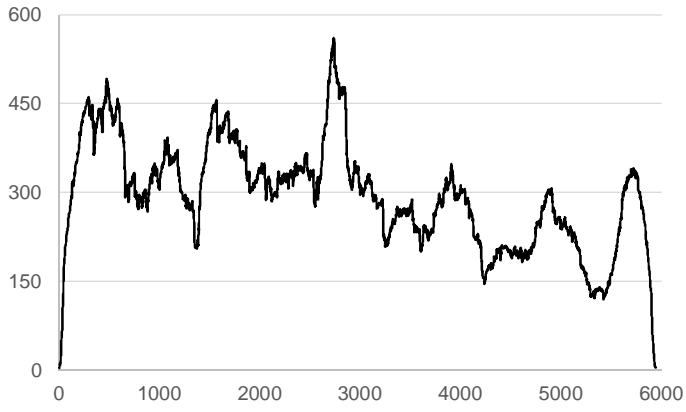

S17-172\_VPZV-1 S seg\_MH483039

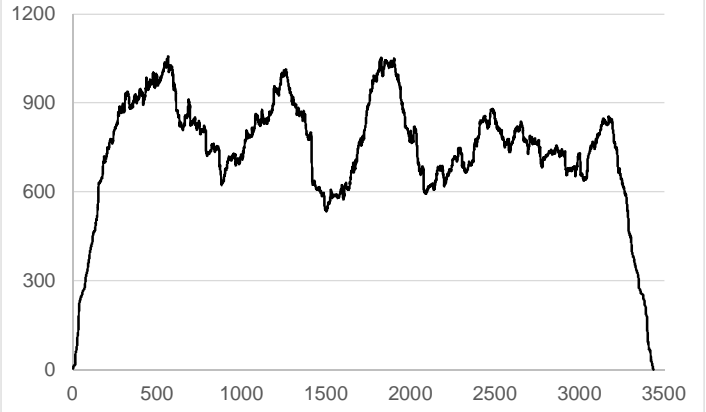

Sn36\_VZPV-2 L seg\_MH483044

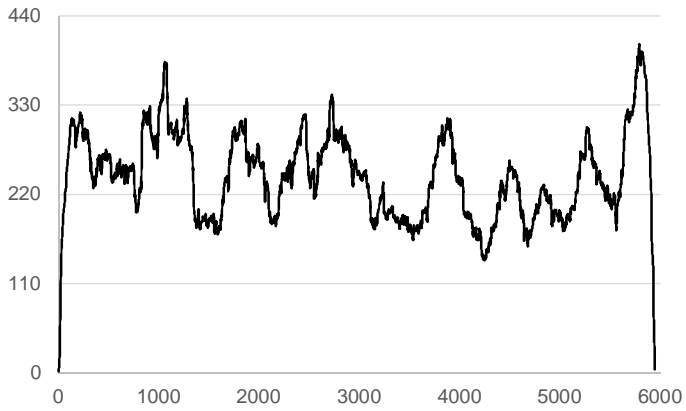

Sn36\_VZPV-2 S seg\_MH483043

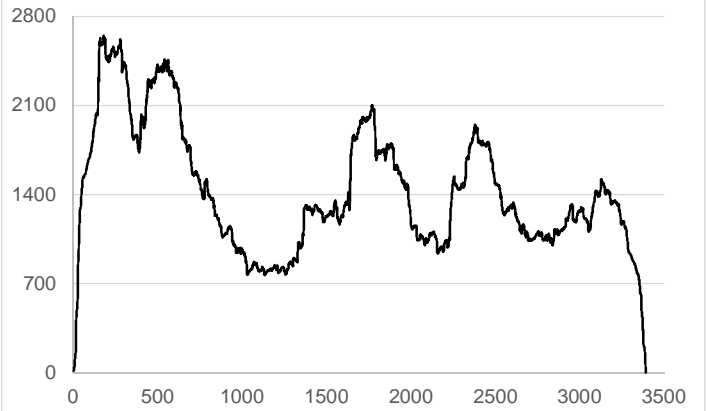

C) Coverage of OScV-1 and OScV-2 L and S segments, snakes 3.1 and 3.2 (table 1).

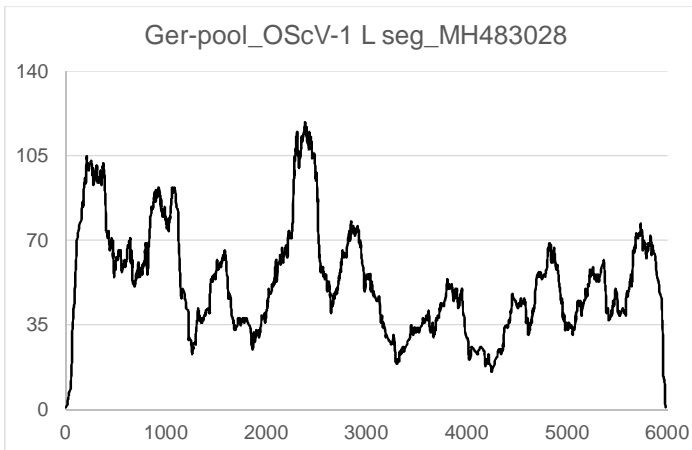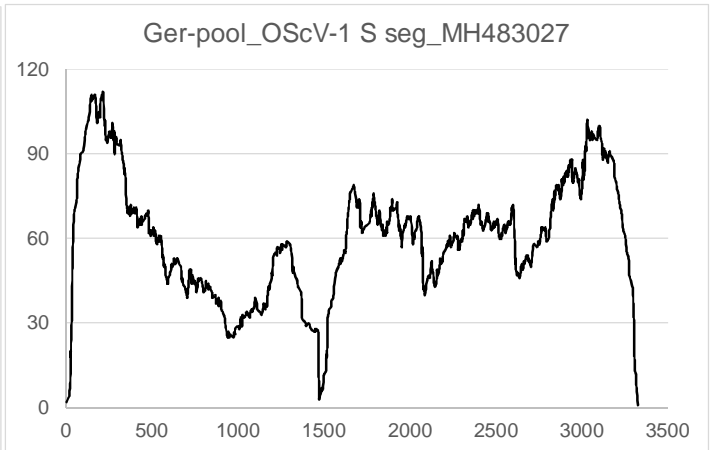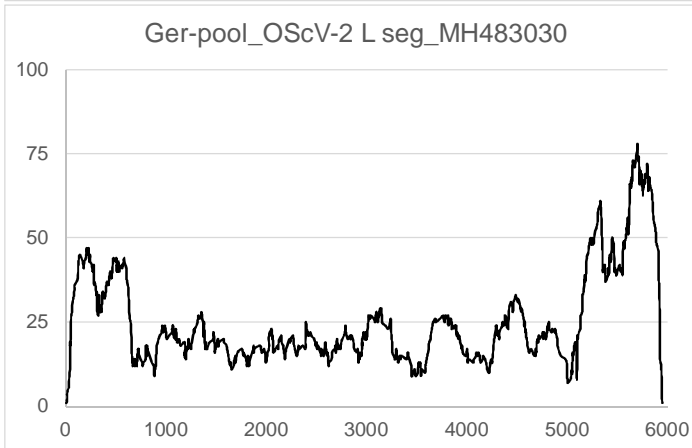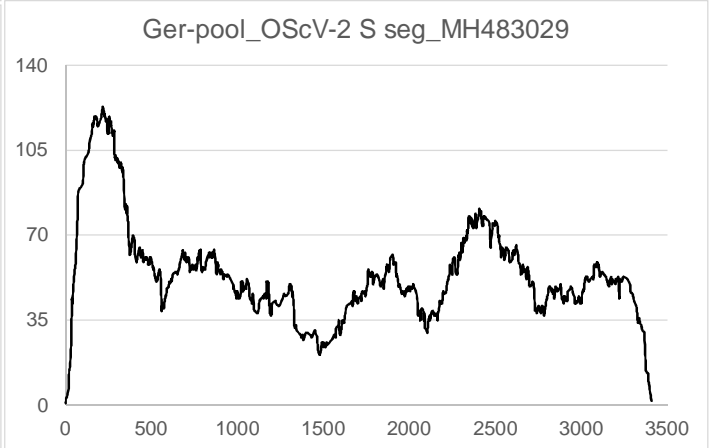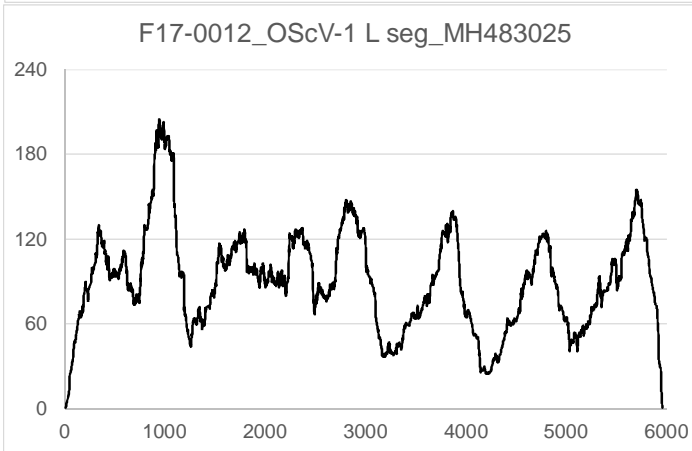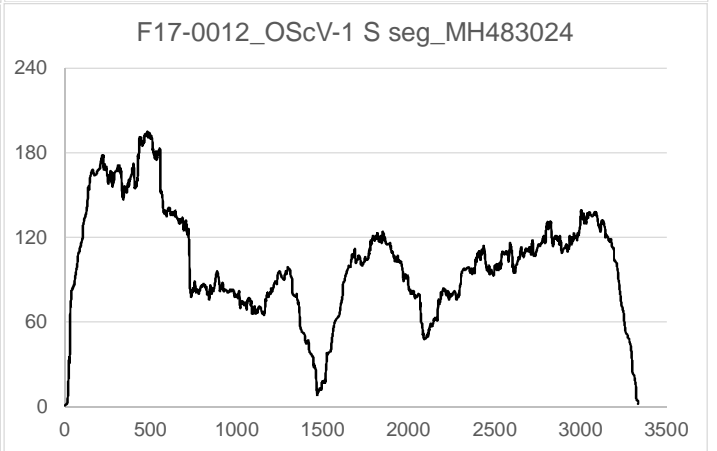

D) Coverage of DaMV-1 L and S segment, snake 4.1 (table 1).

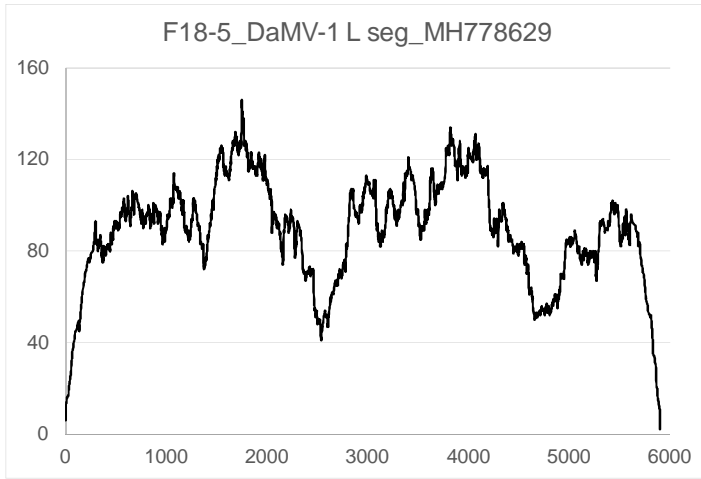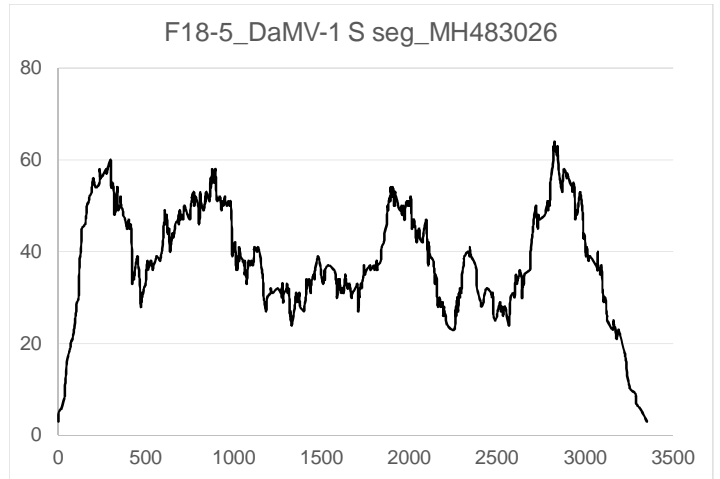

Supplement: ppat.1007415.s003.pdf [file ppat.1007415.s003.pdf]
