# Supplementary material for: Characterization of Haartman Institute snake virus-1 (HISV-1) and HISV-like viruses—The representatives of genus Hartmanivirus, family Arenaviridae
Source: PubMed Central journal article supplement (PMC6261641; doi:10.1371/journal.ppat.1007415), 2018-11-14

S17-252\_KMHV-1 L seg\_MH483089

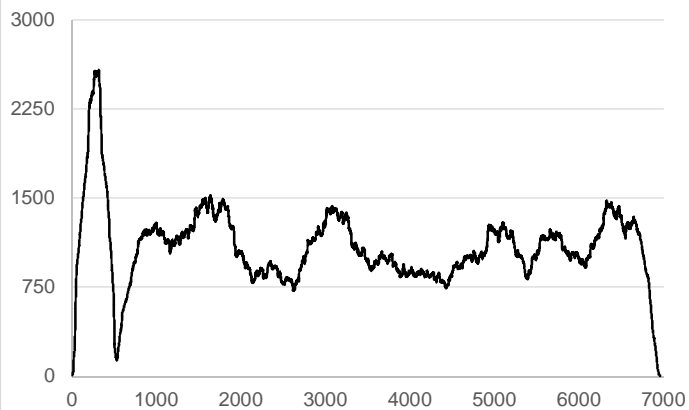

S17-252\_L11 HJV-1 L seg\_MH503955

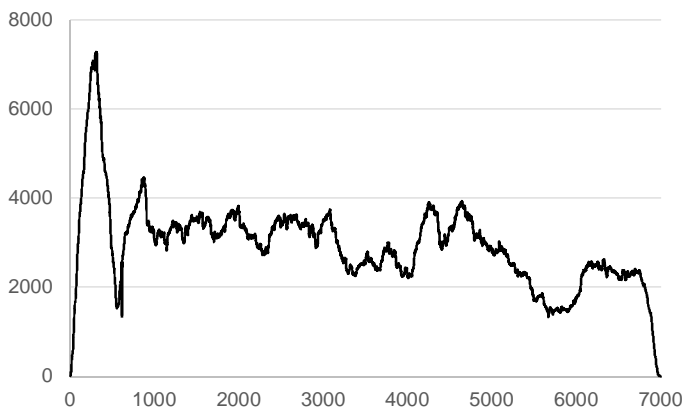

S17-252\_L21 PJV-1 L seg\_MH503956

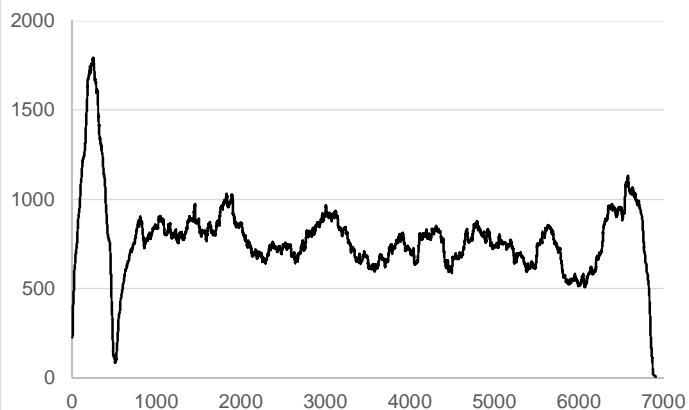

S17-252\_MNTV-1 L seg\_MH483090

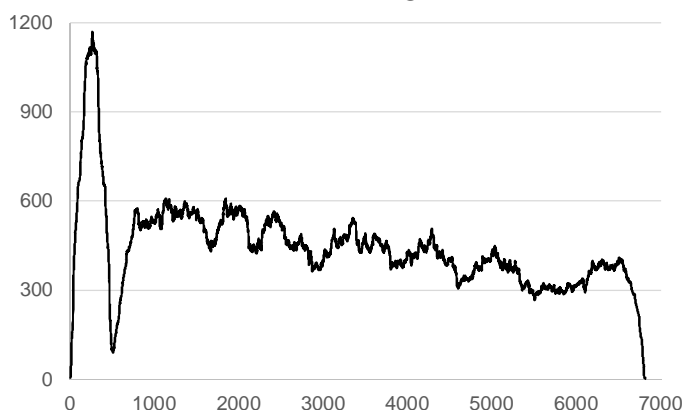

S17-252\_S10-like S seg\_MH503957

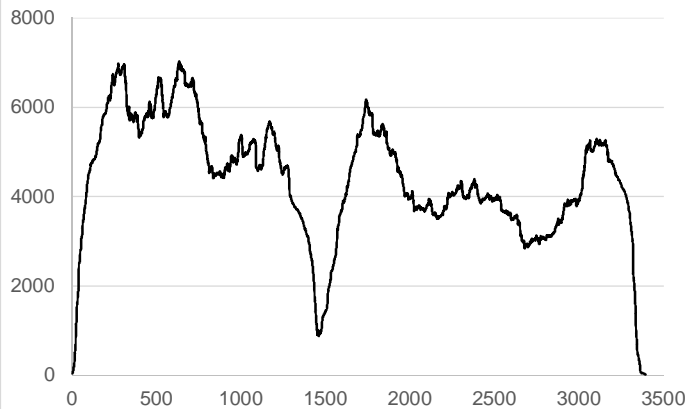

**B) Coverage of reptarenavirus L and S segments identified in Snake 2.1 (table 1).**

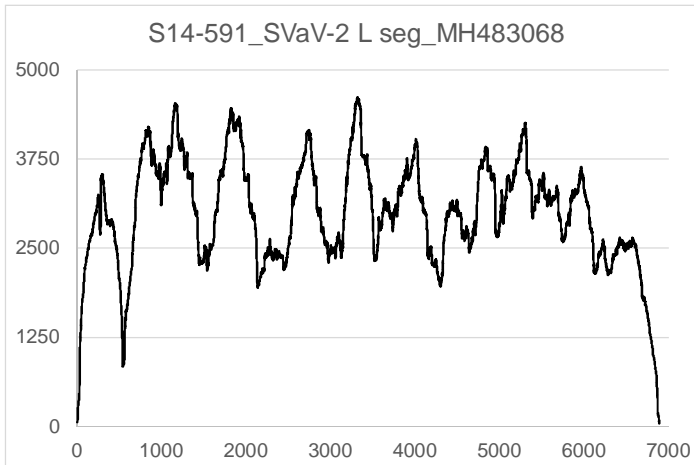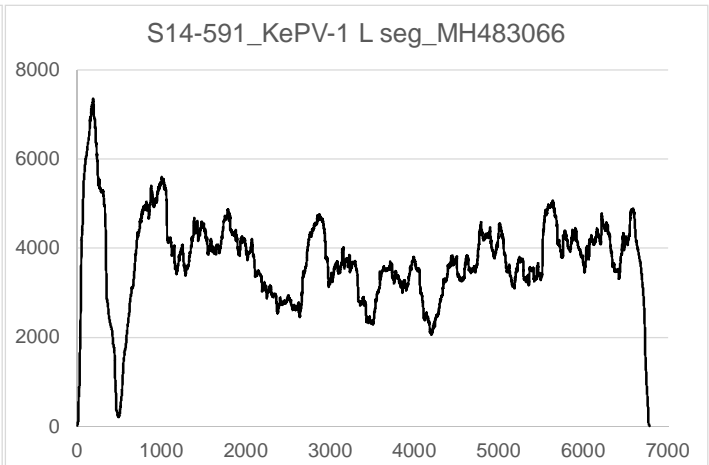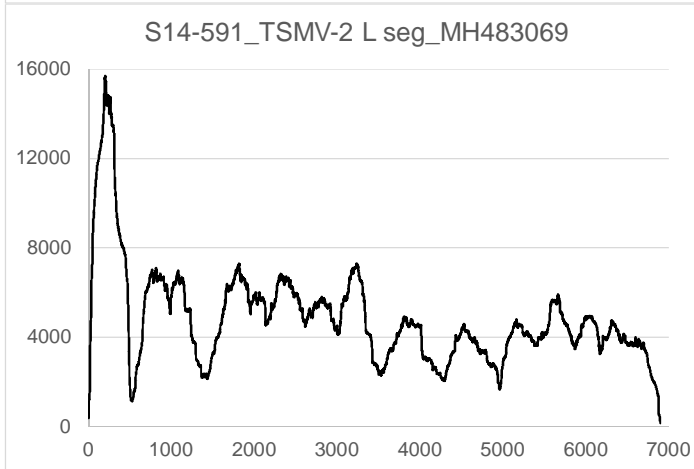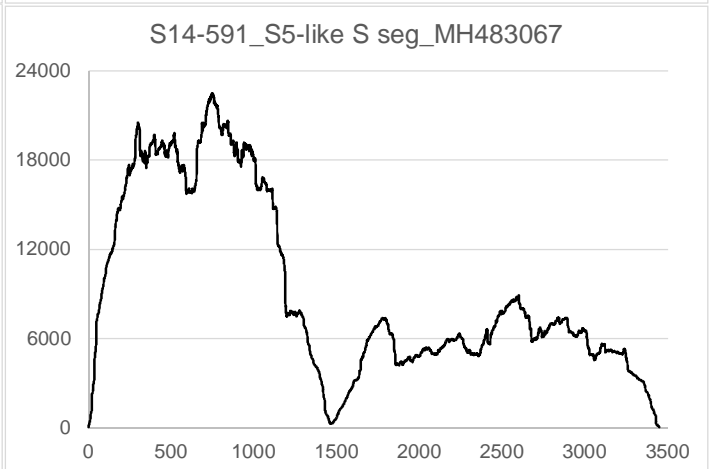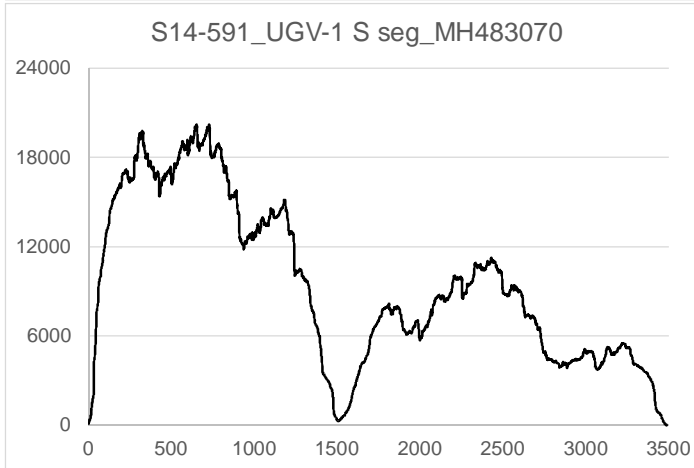

C) Coverage of reptarenavirus L and S segments identified in Snake 2.2 (table 1).

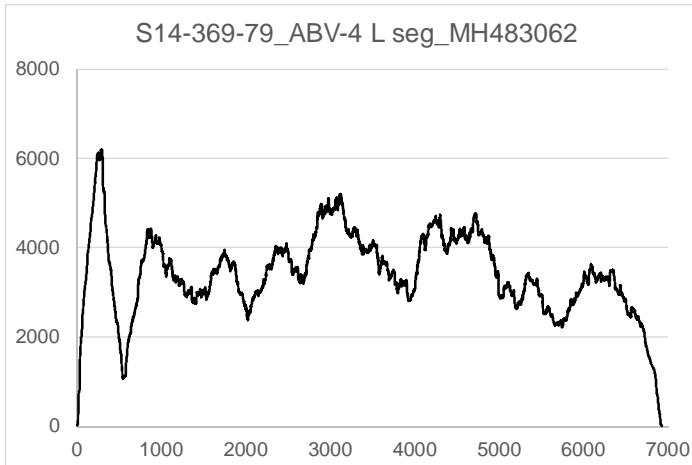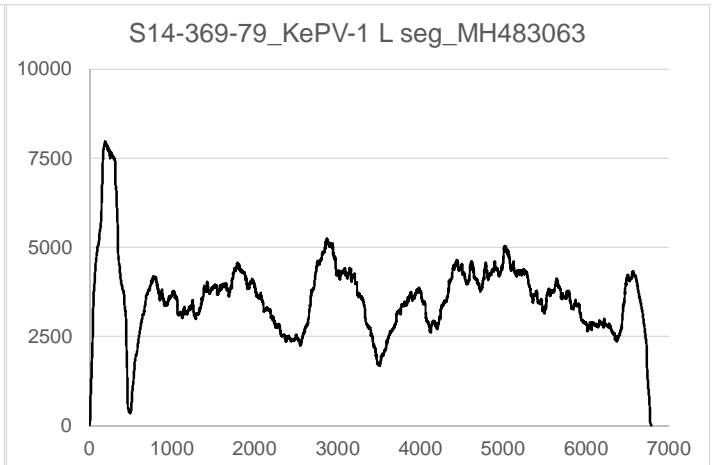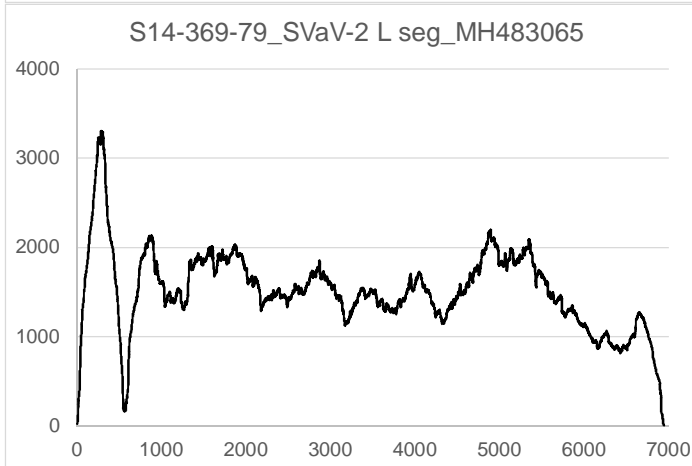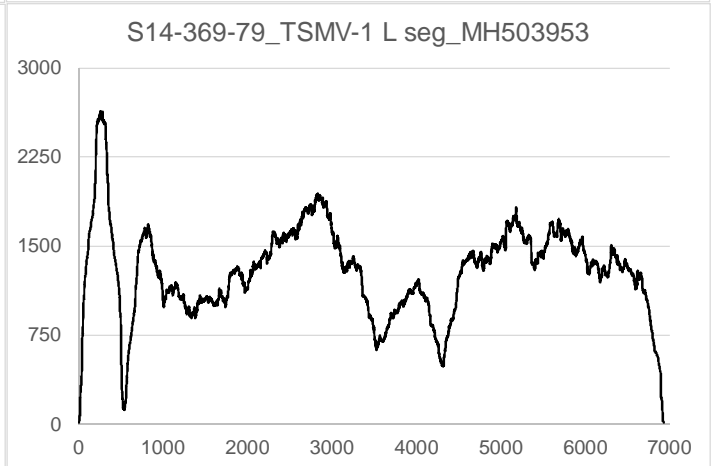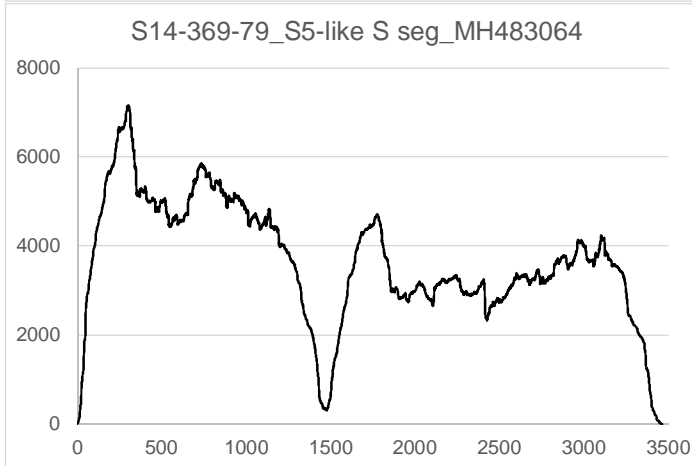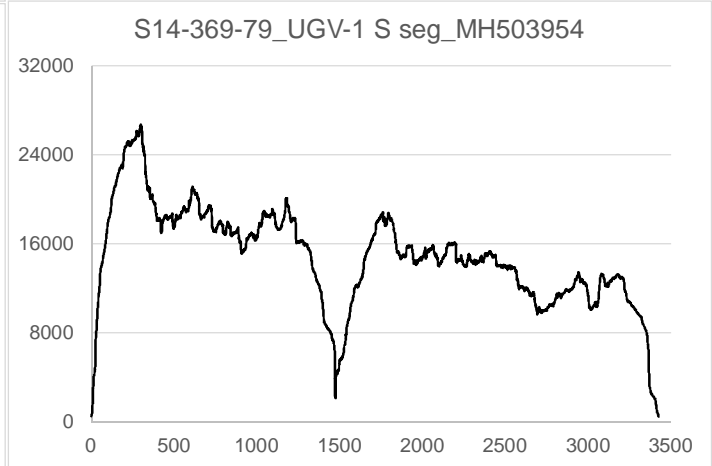

D) Coverage of reptarenavirus L and S segments identified in Snakes 2.3 and 2.4 (table 1).

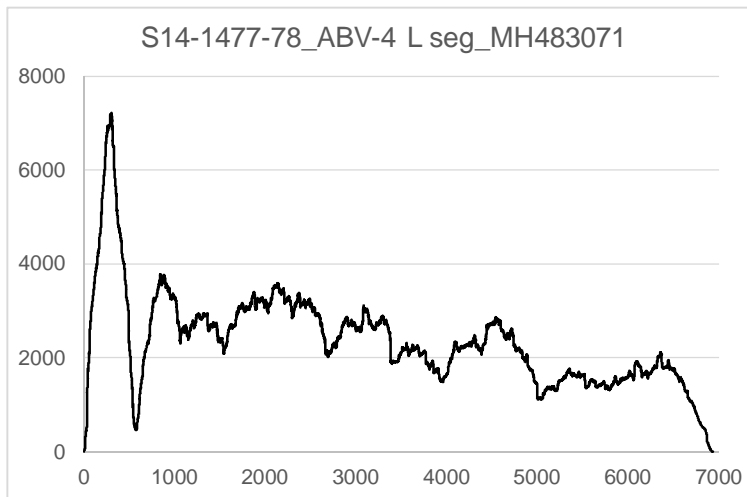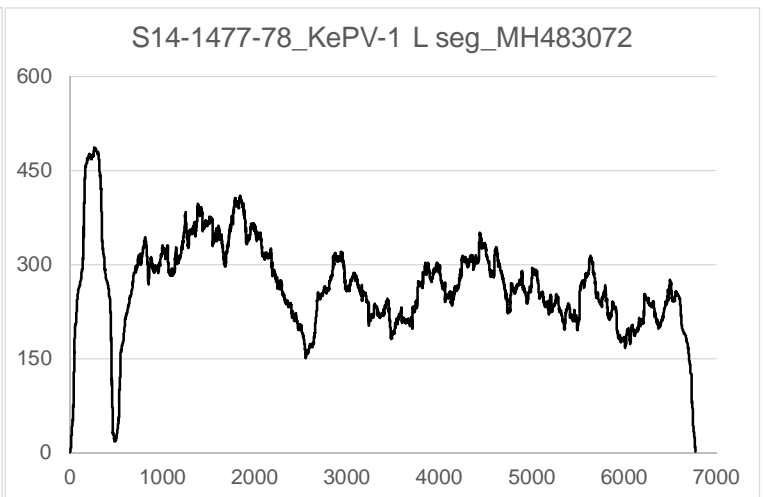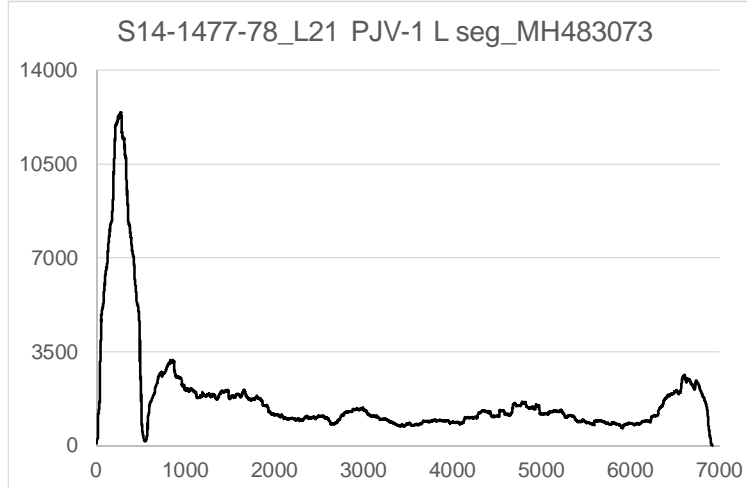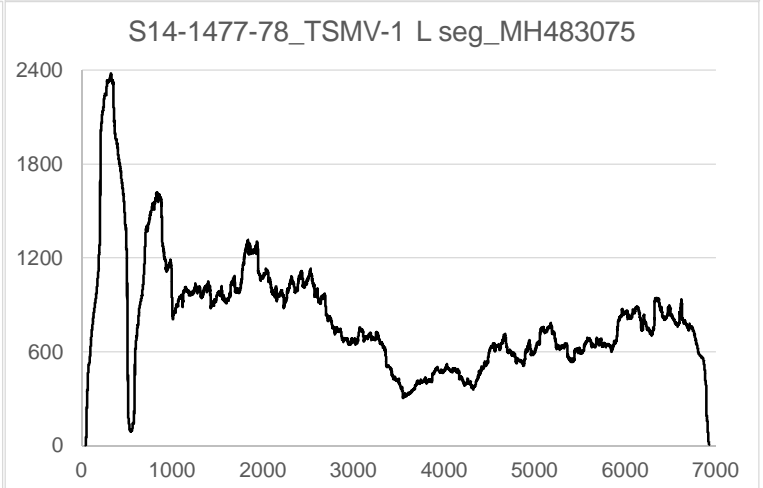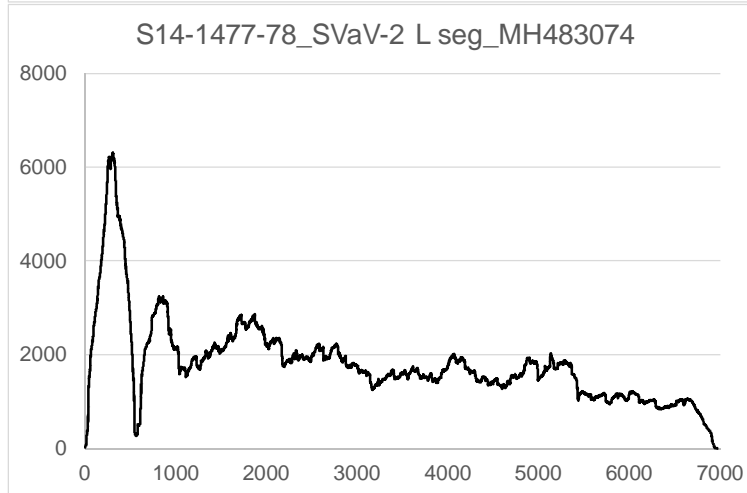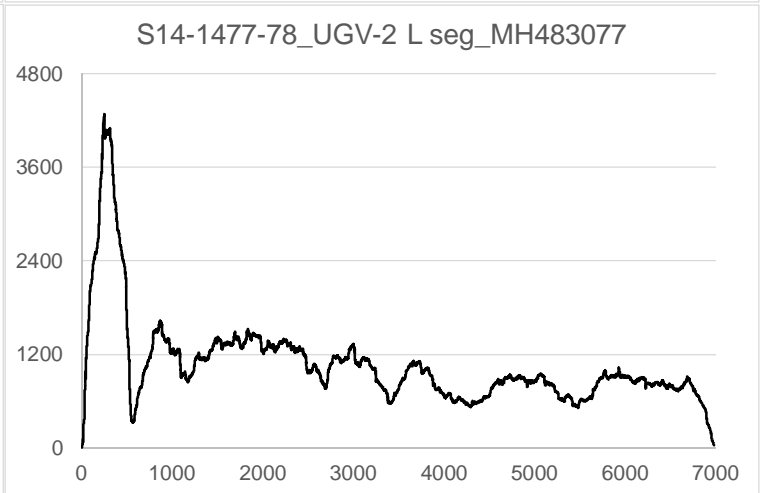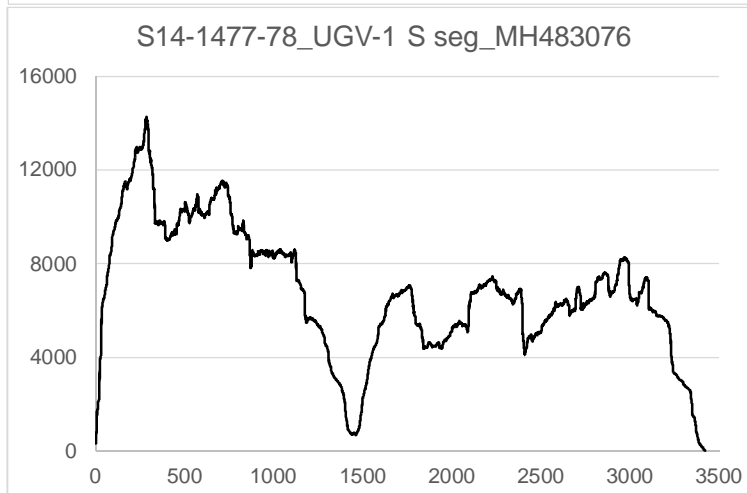

E) Coverage of reptarenavirus L and S segments identified in Snake 2.5 (table 1).

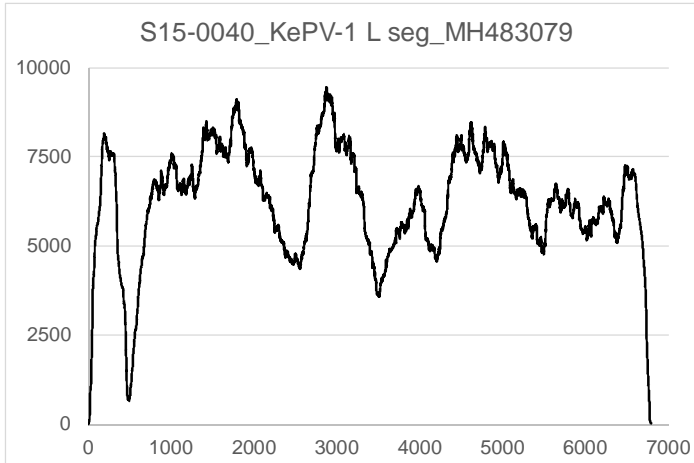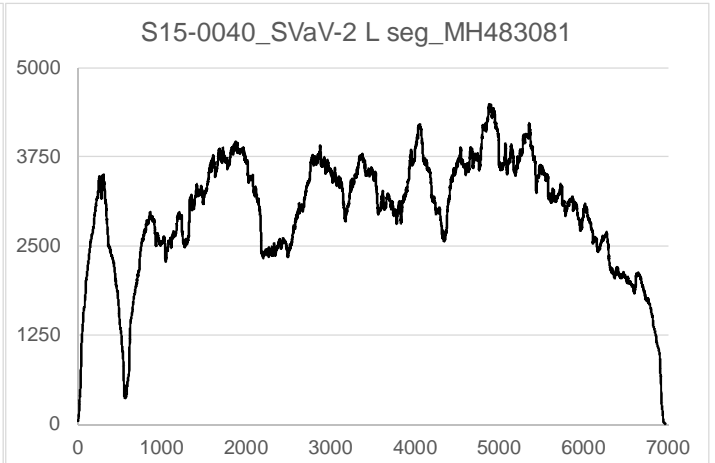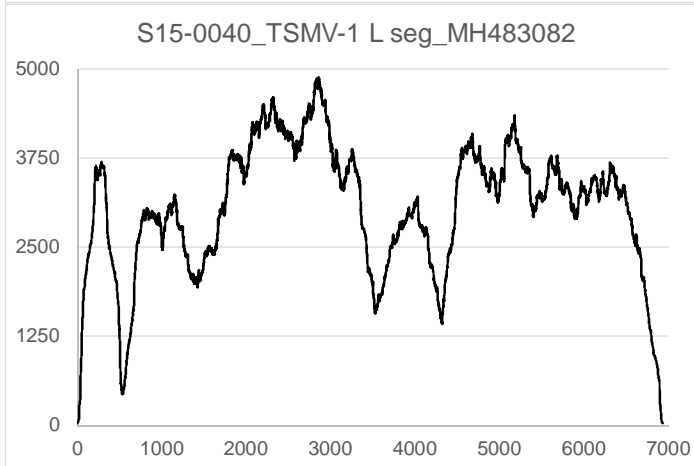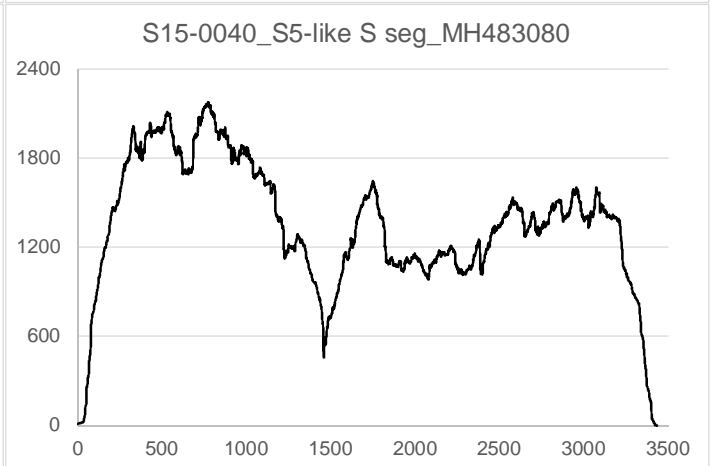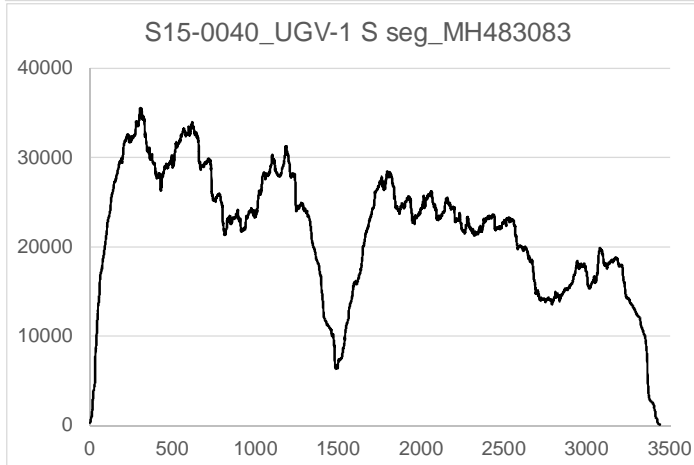

F) Coverage of reptarenavirus L and S segments identified in Snake 2.6 (table 1).

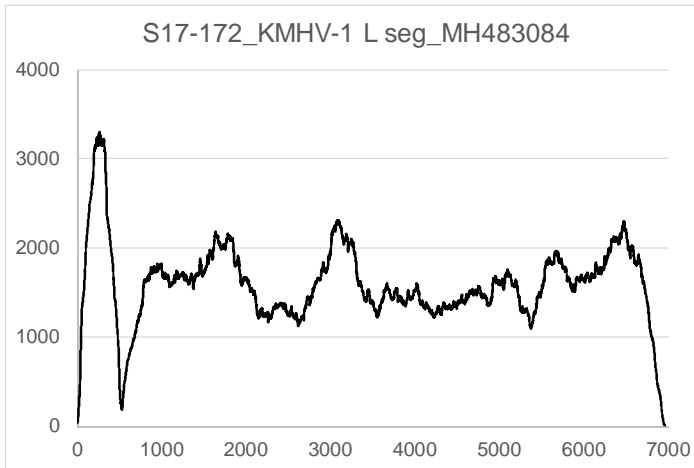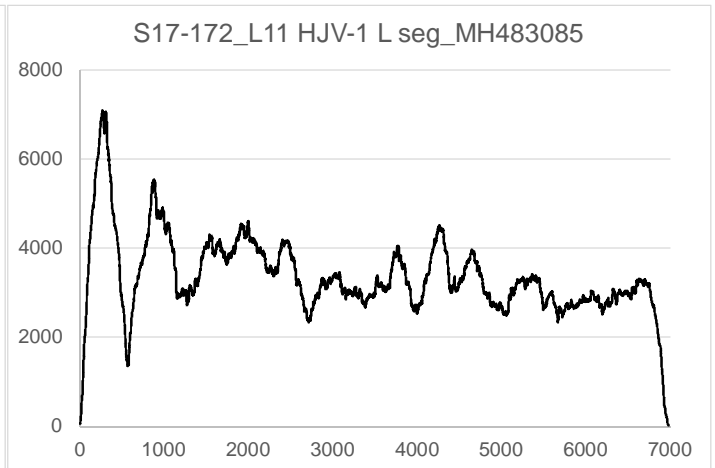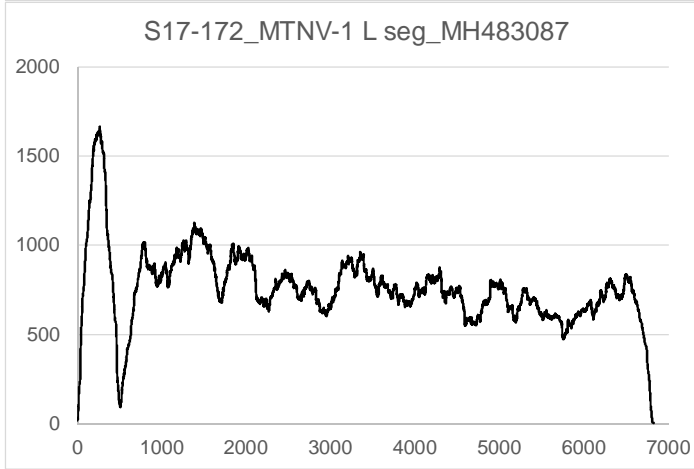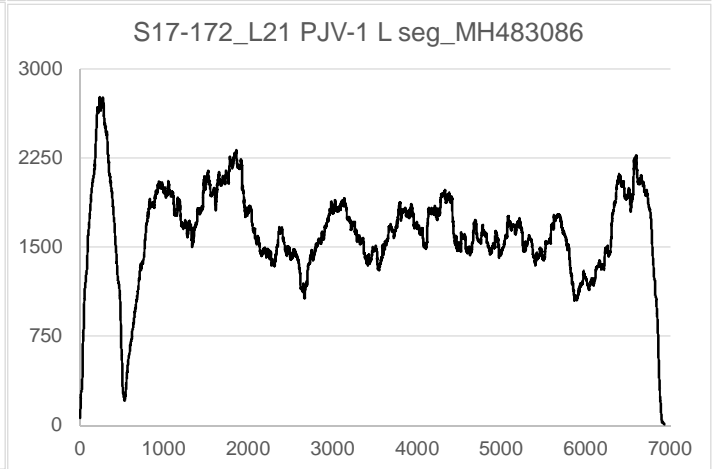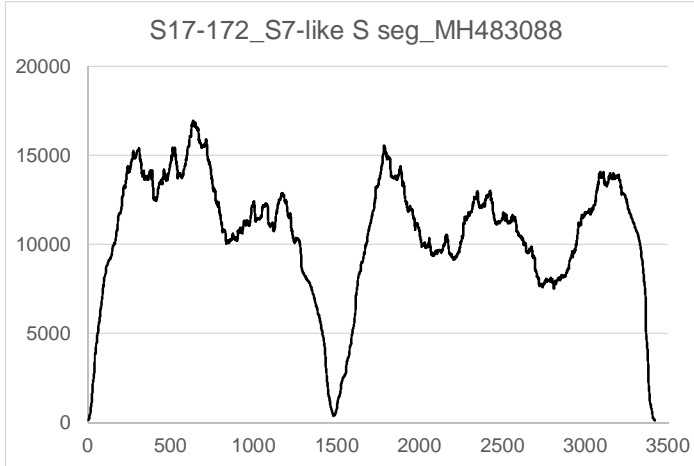

G) Coverage of reptarenavirus L and S segments identified in Snake 2.7 (table 1).

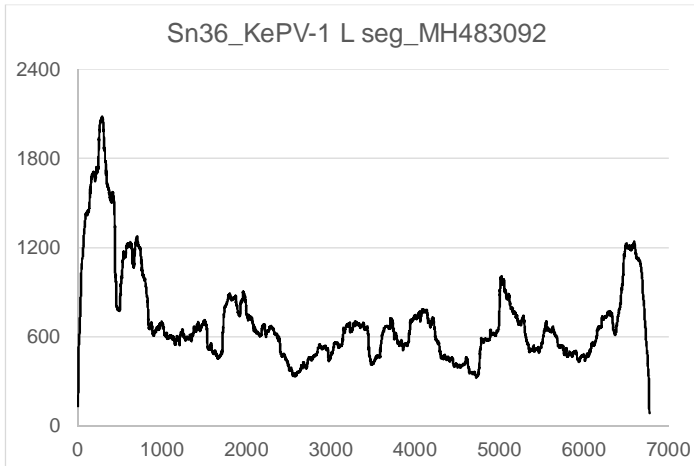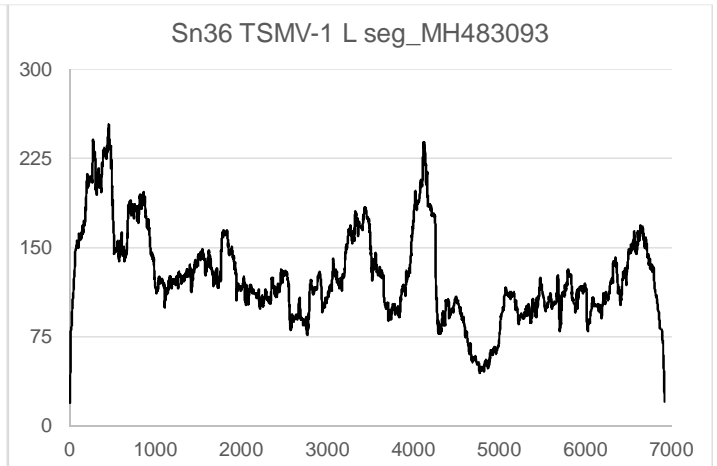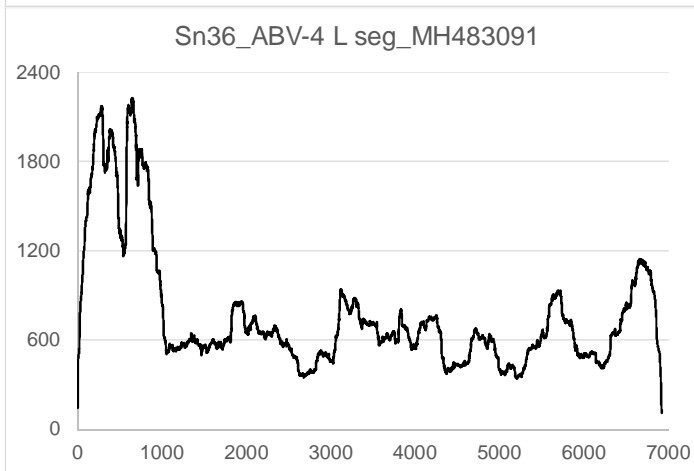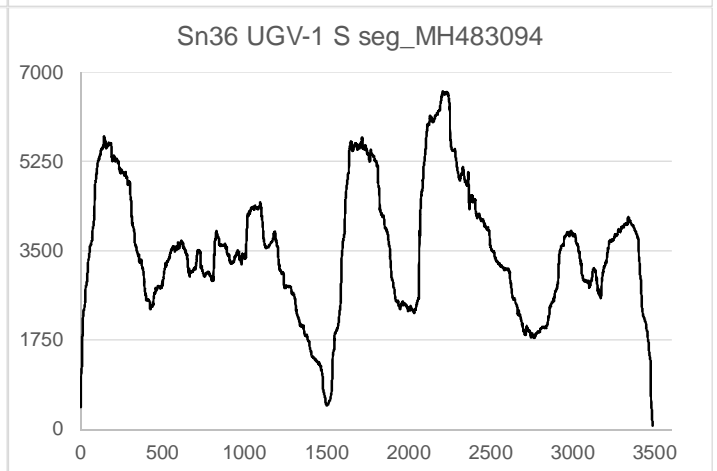

H) Coverage of reptarenavirus L and S segments identified in Snakes 3.1 (table 1).

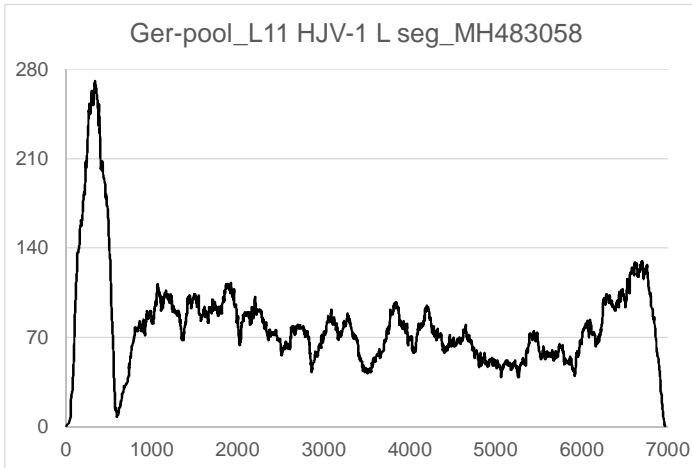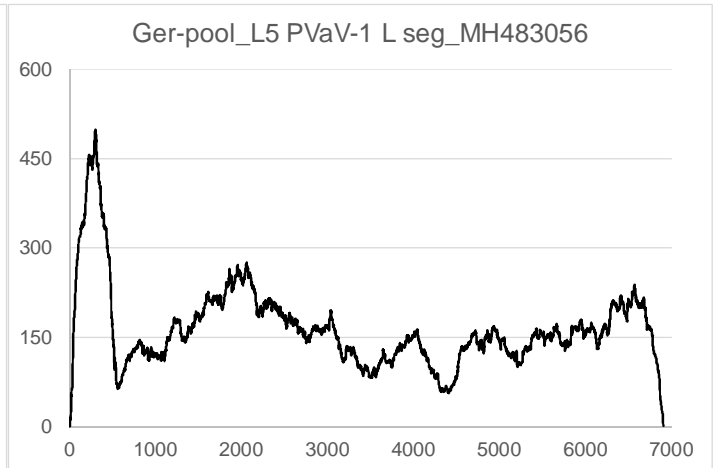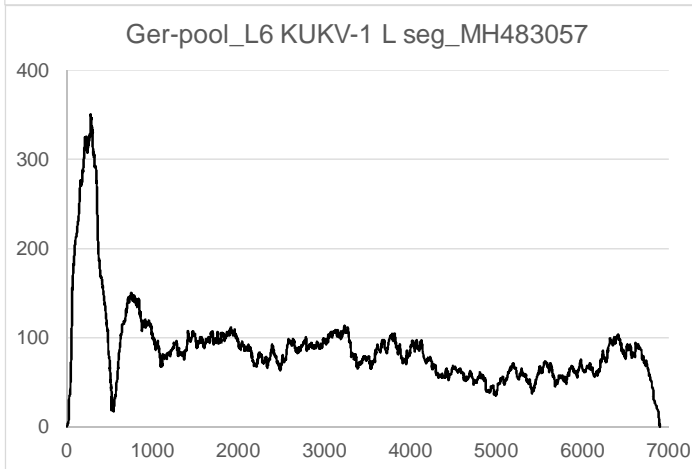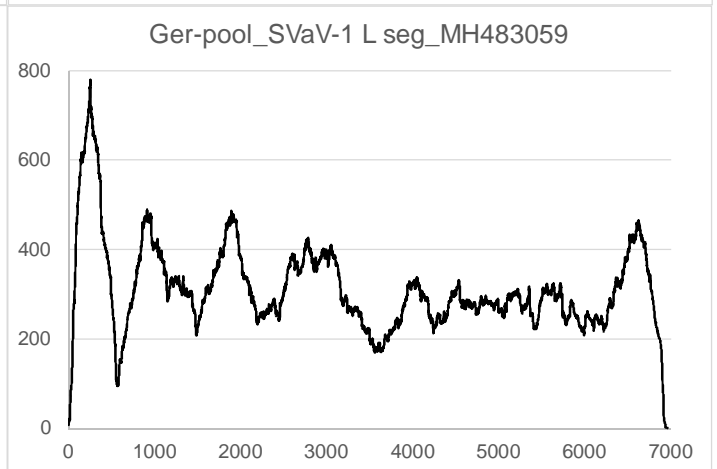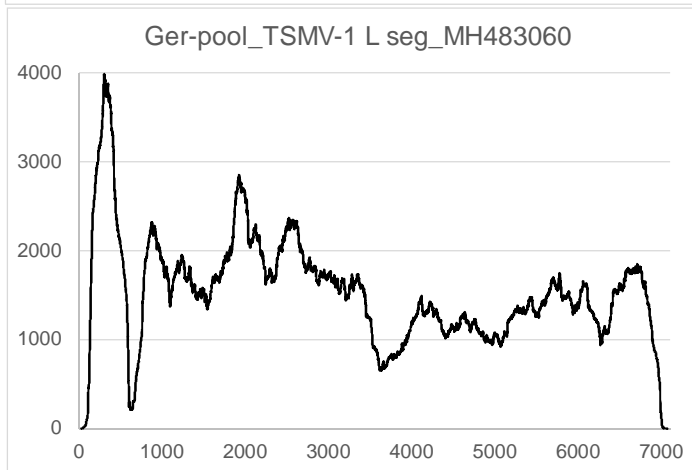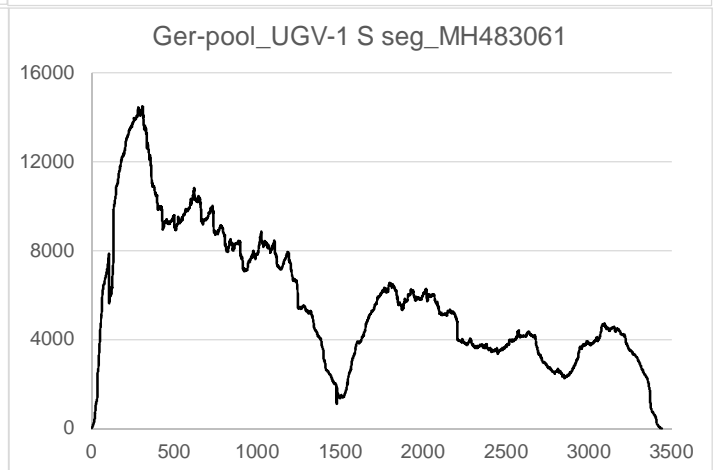



D) Coverage of reptarenavirus L and S segments identified in Snakes 3.2 (table 1).

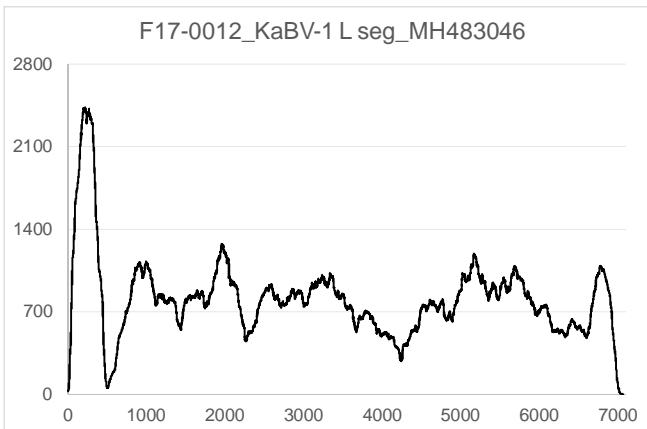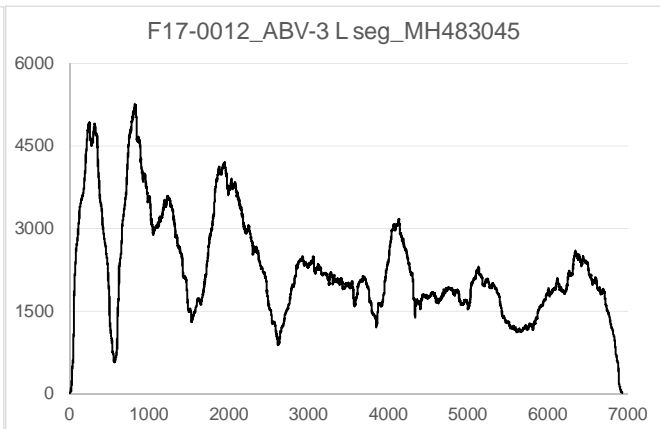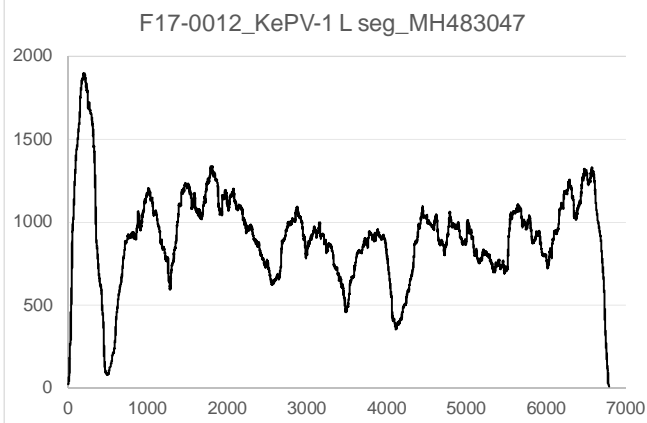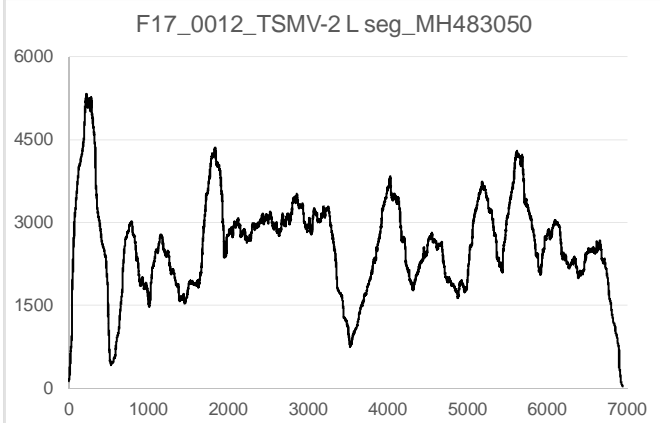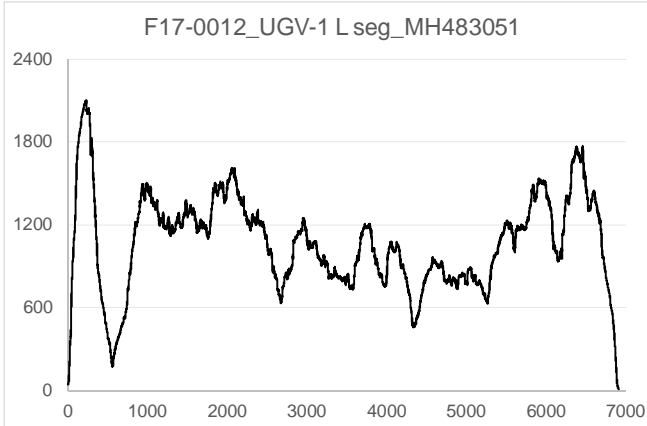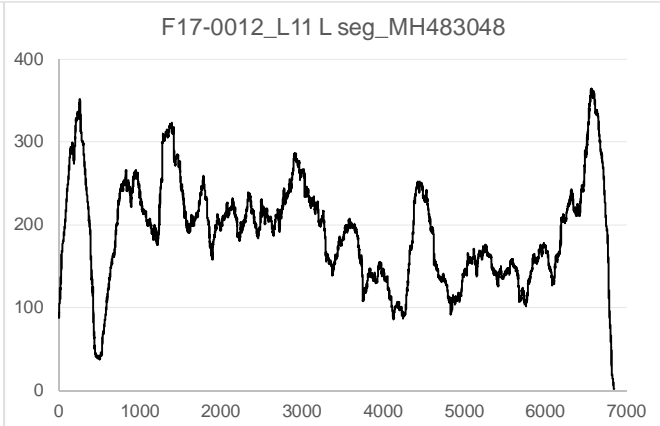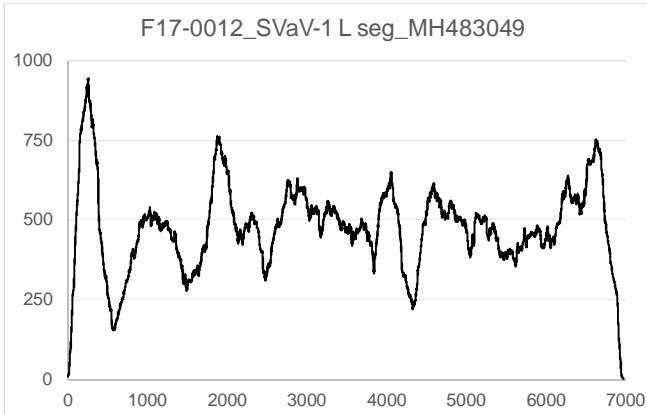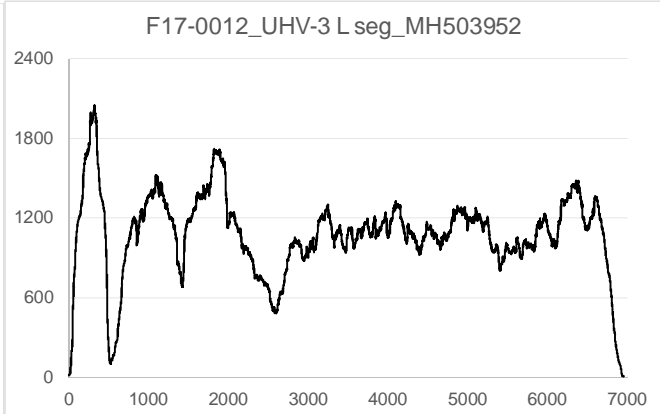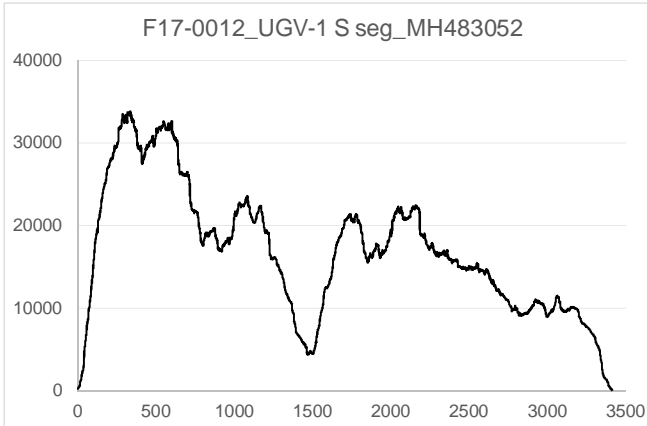

J) Coverage of reptarenavirus L and S segments identified in Snake 4.1 (table 1).

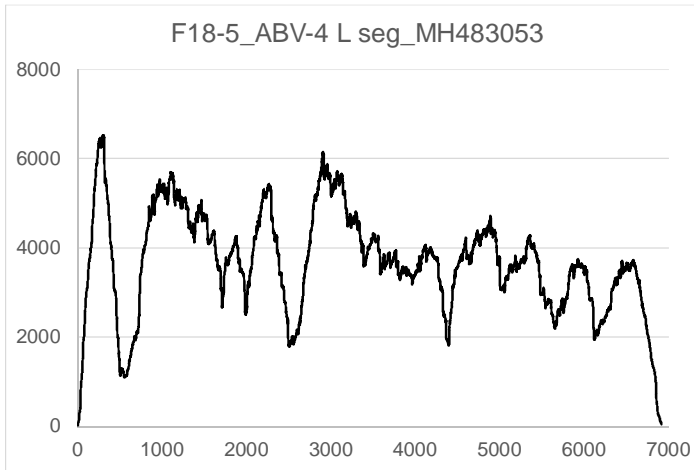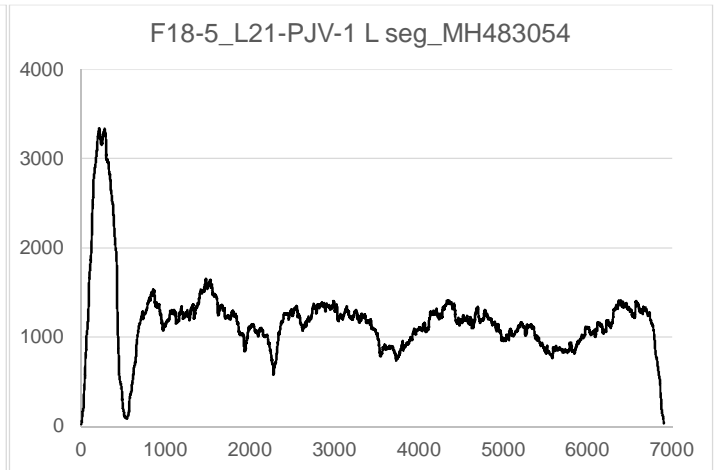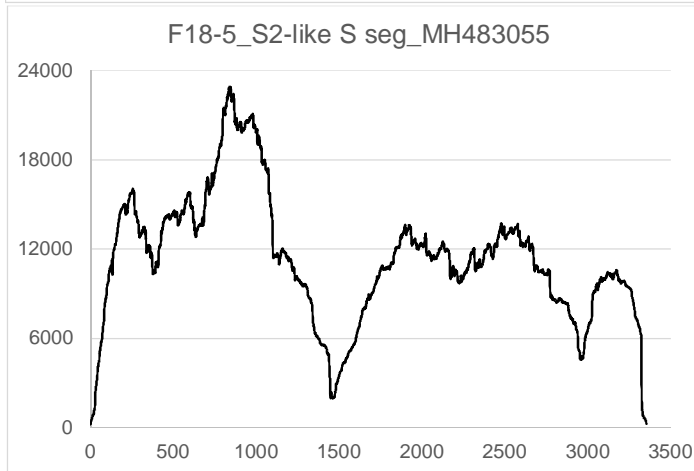

Supplement: ppat.1007415.s004.pdf [file ppat.1007415.s004.pdf]
