# Supplementary material for: Characterization of Haartman Institute snake virus-1 (HISV-1) and HISV-like viruses—The representatives of genus Hartmanivirus, family Arenaviridae
Source: PubMed Central journal article supplement (PMC6261641; doi:10.1371/journal.ppat.1007415), 2018-11-14

**Supplementary table and figure 3.** Results of PASC analysis: similarities between hartmanivirus L and S segments above, and top matches for HISV-1 L and S segments below.

### L segments

|        | HISV-1  | HISV-2  | OScV-1  | OScV-2  | VPZV-1  | VPZV-2  | DaMV-1  |
|--------|---------|---------|---------|---------|---------|---------|---------|
| HISV-1 | 100,0 % |         |         |         |         |         |         |
| HISV-2 | 88,7 %  | 100,0 % |         |         |         |         |         |
| OScV-1 | 62,8 %  | 63,4 %  | 100,0 % |         |         |         |         |
| OScV-2 | 63,3 %  | 64,1 %  | 85,0 %  | 100,0 % |         |         |         |
| VPZV-1 | 63,9 %  | 63,4 %  | 63,3 %  | 63,9 %  | 100,0 % |         |         |
| VPZV-2 | 64,0 %  | 62,9 %  | 62,4 %  | 63,1 %  | 85,9 %  | 100,0 % |         |
| DaMV-1 | 66,8 %  | 67,3 %  | 63,6 %  | 62,9 %  | 63,5 %  | 64,3 %  | 100,0 % |

### S segments

|        | HISV-1  | HISV-2  | OScV-1  | OScV-2  | VPZV-1  | VPZV-2  | DaMV-1  |
|--------|---------|---------|---------|---------|---------|---------|---------|
| HISV-1 | 100,0 % |         |         |         |         |         |         |
| HISV-2 | 85,4 %  | 100,0 % |         |         |         |         |         |
| OScV-1 | 59,0 %  | 58,9 %  | 100,0 % |         |         |         |         |
| OScV-2 | 59,0 %  | 59,3 %  | 78,0 %  | 100,0 % |         |         |         |
| VPZV-1 | 59,8 %  | 59,9 %  | 58,9 %  | 57,9 %  | 100,0 % |         |         |
| VPZV-2 | 61,2 %  | 60,0 %  | 58,5 %  | 57,1 %  | 83,8 %  | 100,0 % |         |
| DaMV-1 | 64,9 %  | 64,3 %  | 59,5 %  | 60,4 %  | 60,7 %  | 61,0 %  | 100,0 % |

Top matches for Icl|HISV-1\_isolate1 L segment:

BLAST-based alignments

|    |         |                              |                                                                        |
|----|---------|------------------------------|------------------------------------------------------------------------|
| 1  | 19,05 % | gi 62766429 gb AY924389.1    | Mammarenavirus Serra do Navio mammarenavirus                           |
| 2  | 18,27 % | gi 821492670 gb KP071674.1   | Reptarenavirus unclassified Reptarenavirus unidentified Reptarenavirus |
| 3  | 18,17 % | gi 34365541 ref NC_005082.1  | Mammarenavirus Guanarito mammarenavirus                                |
| 4  | 16,79 % | gi 164519632 gb AY216503.2   | Mammarenavirus Bear Canyon mammarenavirus                              |
| 5  | 16,44 % | gi 821492083 gb KP071510.1   | Reptarenavirus unclassified Reptarenavirus unidentified Reptarenavirus |
| 6  | 16,38 % | gi 821492546 gb KP071642.1   | Reptarenavirus unclassified Reptarenavirus unidentified Reptarenavirus |
| 7  | 16,21 % | gi 821492209 gb KP071547.1   | Reptarenavirus unclassified Reptarenavirus unidentified Reptarenavirus |
| 8  | 16,20 % | gi 155733526 gb EF529745.1   | Mammarenavirus Cali mammarenavirus                                     |
| 9  | 16,10 % | gi 821492247 gb KP071561.1   | Reptarenavirus unclassified Reptarenavirus unidentified Reptarenavirus |
| 10 | 16,09 % | gi 821492286 gb KP071570.1   | Reptarenavirus unclassified Reptarenavirus unidentified Reptarenavirus |
| 11 | 16,03 % | gi 821492697 gb KP071680.1   | Reptarenavirus unclassified Reptarenavirus unidentified Reptarenavirus |
| 12 | 15,91 % | gi 164607196 ref NC_010250.1 | Mammarenavirus Oliveros mammarenavirus                                 |
| 13 | 15,91 % | gi 594140721 ref NC_023763.1 | Mammarenavirus Merino Walk mammarenavirus                              |
| 14 | 15,84 % | gi 821492230 gb KP071552.1   | Reptarenavirus unclassified Reptarenavirus unidentified Reptarenavirus |
| 15 | 15,75 % | gi 385140456 gb JF912084.1   | Mammarenavirus Lymphocytic choriomeningitis mammarenavirus             |

Top matches for Icl|HISV-1\_isolate1 S segment :

BLAST-based alignments

|    |        |                             |                                          |
|----|--------|-----------------------------|------------------------------------------|
| 1  | 18.21% | gi 695315947 gb KM822120.1  | Mammarenavirus Lassa mammarenavirus      |
| 2  | 17.55% | gi 695313614 gb KM821828.1  | Mammarenavirus Lassa mammarenavirus      |
| 3  | 17.28% | gi 695314110 gb KM821882.1  | Mammarenavirus Lassa mammarenavirus      |
| 4  | 17.25% | gi 570339355 gb KC669699.1  | Mammarenavirus Loei River mammarenavirus |
| 5  | 17.08% | gi 695315877 gb KM822113.1  | Mammarenavirus Lassa mammarenavirus      |
| 6  | 16.99% | gi 695313728 gb KM821841.1  | Mammarenavirus Lassa mammarenavirus      |
| 7  | 16.99% | gi 52627079 ref NC_006317.1 | Mammarenavirus Brazilian mammarenavirus  |
| 8  | 16.74% | gi 695313567 gb KM821822.1  | Mammarenavirus Lassa mammarenavirus      |
| 9  | 16.72% | gi 1032562881 gb KT992420.1 | Mammarenavirus Lassa mammarenavirus      |
| 10 | 16.67% | gi 695313258 gb KM821783.1  | Mammarenavirus Lassa mammarenavirus      |
| 11 | 16.58% | gi 695313871 gb KM821856.1  | Mammarenavirus Lassa mammarenavirus      |
| 12 | 16.3%  | gi 695313805 gb KM821848.1  | Mammarenavirus Lassa mammarenavirus      |
| 13 | 16.11% | gi 695313599 gb KM821826.1  | Mammarenavirus Lassa mammarenavirus      |
| 14 | 15.94% | gi 297381012 gb GU830839.1  | Mammarenavirus Lassa mammarenavirus      |
| 15 | 15.89% | gi 46373061 gb AF246121.2   | Mammarenavirus Lassa mammarenavirus      |

Graphical display of PASC analysis results: top panels show PASC analysis of all hartmanivirus S and L segments; bottom panels show PASC analysis of HISV-1 S and L segments below.

### PASC analysis of HISV-1 S (top) and L (bottom) segments.

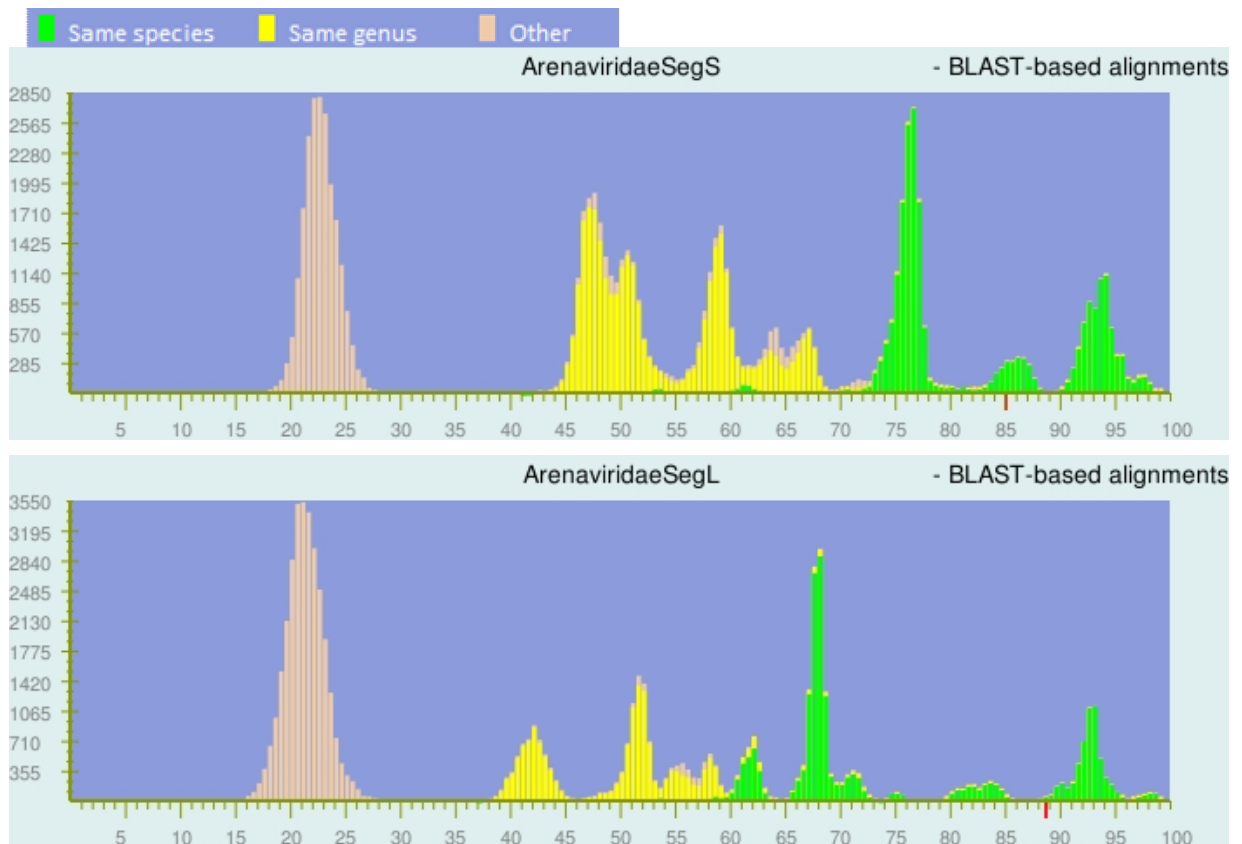

### PASC analysis of S (top) and L (bottom) segments of hartmaniviruses described in this study,.

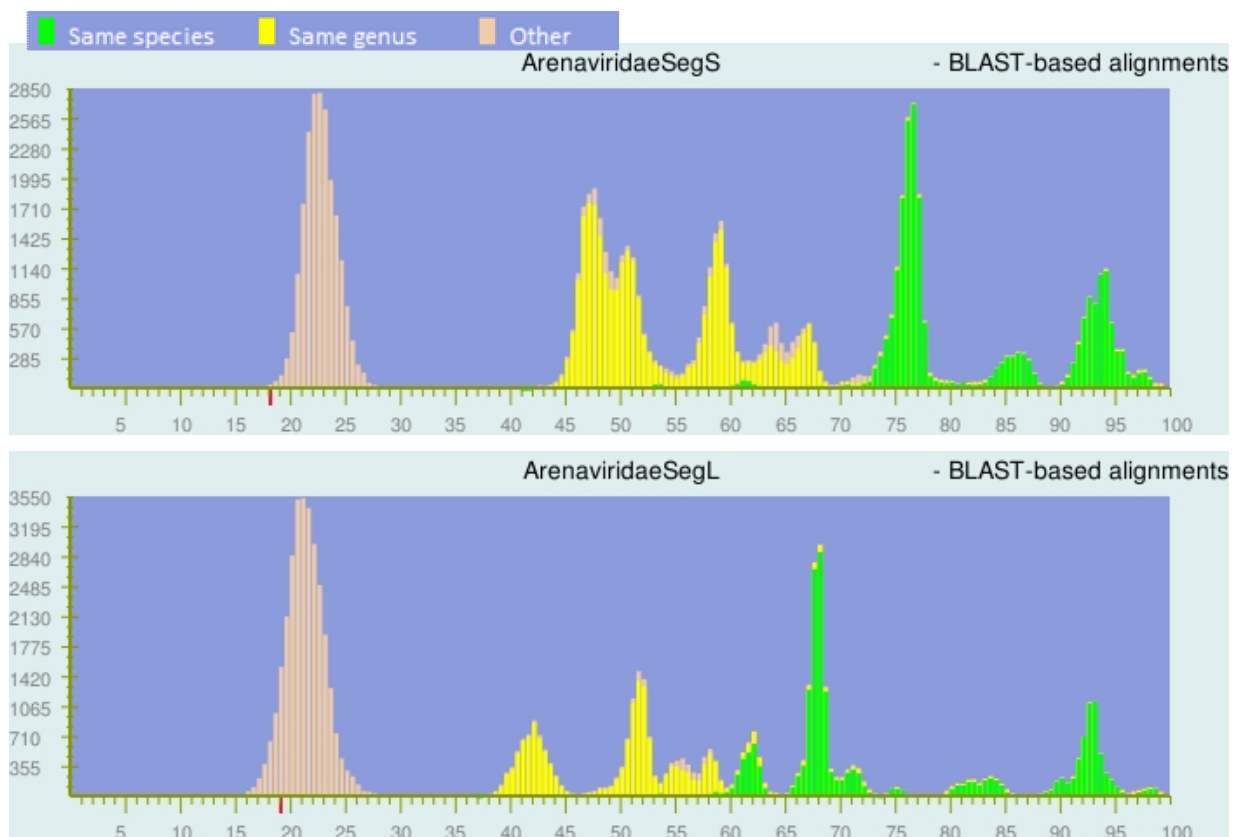

Supplement: ppat.1007415.s007.pdf [file ppat.1007415.s007.pdf]
