# Supplementary material for: Characterization of Haartman Institute snake virus-1 (HISV-1) and HISV-like viruses—The representatives of genus Hartmanivirus, family Arenaviridae
Source: PubMed Central journal article supplement (PMC6261641; doi:10.1371/journal.ppat.1007415), 2018-11-14
Supplement: ppat.1007415.s005.pdf [file ppat.1007415.s005.pdf]

Supplementary table 1. Names, abbreviations, and accession numbers for viruses sequenced in this study.

Genus *Hartmanivirus*

| Virus name                          | Abbreviation | Genome segment | Identifier          | Animal ref. in Table 1                    | GenBank accession no. |
|-------------------------------------|--------------|----------------|---------------------|-------------------------------------------|-----------------------|
| Old schoolhouse virus-1             | OScV-1       | S              | F17-0012-1 and -3   | 3.2. (pool of BIBD pos. snakes)           | MH483024              |
| Old schoolhouse virus-1             | OScV-1       | L              | F17-0012-1 and -3   | 3.2. (pool of BIBD pos. snakes)           | MH483025              |
| Dante Muikkunen virus-1             | DaMV-1       | S              | F18-5               | 4.1.                                      | MH483026              |
| Dante Muikkunen virus-1             | DaMV-1       | L              | F18-5               | 4.1.                                      | MH778629              |
| Old schoolhouse virus-1             | OScV-1       | S              | Ger-pool            | 3.1. (pool of BIBD pos. snakes)           | MH483027              |
| Old schoolhouse virus-1             | OScV-1       | L              | Ger-pool            | 3.1. (pool of BIBD pos. snakes)           | MH483028              |
| Old schoolhouse virus-2             | OScV-2       | S              | Ger-pool            | 3.1. (pool of BIBD pos. snakes)           | MH483029              |
| Old schoolhouse virus-2             | OScV-2       | L              | Ger-pool            | 3.1. (pool of BIBD pos. snakes)           | MH483030              |
| Haartman Institute Snake virus-1    | HISV-1       | S              | HISV-1 pure isolate | 1.1. (origin of isolate)                  | KR870017              |
| Haartman Institute Snake virus-1    | HISV-1       | L              | HISV-1 pure isolate | 1.1. (origin of isolate)                  | KR870031              |
| Veterinary Pathology Zurich virus-1 | VPZV-1       | S              | S14-369 to -79 pool | 2.2. (pool of BIBD pos. snakes)           | MH483031              |
| Veterinary Pathology Zurich virus-1 | VPZV-1       | L              | S14-369 to -79 pool | 2.2. (pool of BIBD pos. snakes)           | MH483032              |
| Veterinary Pathology Zurich virus-1 | VPZV-1       | S              | S14-0591            | 2.1.                                      | MH483033              |
| Veterinary Pathology Zurich virus-1 | VPZV-1       | L              | S14-0591            | 2.1.                                      | MH483034              |
| Veterinary Pathology Zurich virus-1 | VPZV-1       | S              | S14-1477 and -1478  | 2.3. and 2.4 (pool of BIBD pos. snakes)   | MH483035              |
| Veterinary Pathology Zurich virus-1 | VPZV-1       | L              | S14-1477 and -1478  | 2.3. and 2.4 (pool of BIBD pos. snakes)   | MH483036              |
| Veterinary Pathology Zurich virus-1 | VPZV-1       | S              | S15-0040            | 2.5.                                      | MH483037              |
| Veterinary Pathology Zurich virus-1 | VPZV-1       | L              | S15-0040            | 2.5.                                      | MH483038              |
| Veterinary Pathology Zurich virus-1 | VPZV-1       | S              | S17-172             | 2.6.                                      | MH483039              |
| Veterinary Pathology Zurich virus-1 | VPZV-1       | L              | S17-172             | 2.6.                                      | MH483040              |
| Haartman Institute Snake virus-2    | HISV-2       | S              | S17-252             | 1.4.                                      | MH483041              |
| Haartman Institute Snake virus-2    | HISV-2       | L              | S17-252             | 1.4.                                      | MH483042              |
| Veterinary Pathology Zurich virus-2 | VZVP-2       | S              | Sn36                | 2.7. (origin of cell culture grown virus) | MH483043              |
| Veterinary Pathology Zurich virus-2 | VZVP-2       | L              | Sn36                | 2.7. (origin of cell culture grown virus) | MH483044              |

Genus *Reptarenavirus*

| Virus name                          | Abbreviation | Genome segment | Identifier          | Animal ref. in Table 1          | GenBank accession no. |
|-------------------------------------|--------------|----------------|---------------------|---------------------------------|-----------------------|
| Aurora borealis virus-3             | ABV-3        | L              | F17-0012-1 and -3   | 3.2. (pool of BIBD pos. snakes) | MH483045              |
| Kaltenbach virus-1                  | KaBV-1       | L              | F17-0012-1 and -3   | 3.2. (pool of BIBD pos. snakes) | MH483046              |
| Keijut pohjoismaissa virus-1        | KePV-1       | L              | F17-0012-1 and -3   | 3.2. (pool of BIBD pos. snakes) | MH483047              |
| Hipoen jatsoon virus-1              | HJV-1        | L              | F17-0012-1 and -3   | 3.2. (pool of BIBD pos. snakes) | MH483048              |
| Suri Vanera virus-1                 | SVaV-1       | L              | F17-0012-1 and -3   | 3.2. (pool of BIBD pos. snakes) | MH483049              |
| Tavallinen suomalainen mies virus-2 | TSMV-2       | L              | F17-0012-1 and -3   | 3.2. (pool of BIBD pos. snakes) | MH483050              |
| University of Giessen virus-1       | UGV-1        | L              | F17-0012-1 and -3   | 3.2. (pool of BIBD pos. snakes) | MH483051              |
| University of Giessen virus-1       | UGV-1        | S              | F17-0012-1 and -3   | 3.2. (pool of BIBD pos. snakes) | MH483052              |
| University of Helsinki virus-3      | UHV-3        | L              | F17-0012-1 and -3   | 3.2. (pool of BIBD pos. snakes) | MH503952              |
| Aurora borealis virus-4             | ABV-4        | L              | F18-5               | 4.1.                            | MH483053              |
| Peto jauhoksi virus-1               | PJV-1        | L              | F18-5               | 4.1.                            | MH483054              |
| S segment similar to S2             | S2-like      | S              | F18-5               | 4.1.                            | MH483055              |
| Peilihimmeli vakooja virus-1        | PVaV-1       | L              | Ger-pool            | 3.1. (pool of BIBD pos. snakes) | MH483056              |
| Kiva uusi käärme virus-1            | KUKV-1       | L              | Ger-pool            | 3.1. (pool of BIBD pos. snakes) | MH483057              |
| Hipoen jatsoon virus-1              | HJV-1        | L              | Ger-pool            | 3.1. (pool of BIBD pos. snakes) | MH483058              |
| Suri Vanera virus-1                 | SVaV-1       | L              | Ger-pool            | 3.1. (pool of BIBD pos. snakes) | MH483059              |
| Tavallinen suomalainen mies virus-1 | TSMV-1       | L              | Ger-pool            | 3.1. (pool of BIBD pos. snakes) | MH483060              |
| University of Giessen virus-1       | UGV-1        | S              | Ger-pool            | 3.1. (pool of BIBD pos. snakes) | MH483061              |
| Aurora borealis virus-4             | ABV-4        | L              | S14-369 to -79 pool | 2.2. (pool of BIBD pos. snakes) | MH483062              |
| Keijut pohjoismaissa virus-1        | KePV-1       | L              | S14-369 to -79 pool | 2.2. (pool of BIBD pos. snakes) | MH483063              |
| S segment similar to S5             | S5-like      | S              | S14-369 to -79 pool | 2.2. (pool of BIBD pos. snakes) | MH483064              |
| Suri Vanera virus-2                 | SVaV-2       | L              | S14-369 to -79 pool | 2.2. (pool of BIBD pos. snakes) | MH483065              |
| Tavallinen suomalainen mies virus-1 | TSMV-1       | L              | S14-369 to -79 pool | 2.2. (pool of BIBD pos. snakes) | MH503953              |
| University of Giessen virus-1       | UGV-1        | S              | S14-369 to -79 pool | 2.2. (pool of BIBD pos. snakes) | MH503954              |
| Keijut pohjoismaissa virus-1        | KePV-1       | L              | S14-0591            | 2.1.                            | MH483066              |
| S segment similar to S5             | S5-like      | S              | S14-0591            | 2.1.                            | MH483067              |
| Suri Vanera virus-2                 | SVaV-2       | L              | S14-0591            | 2.1.                            | MH483068              |
| Tavallinen suomalainen mies virus-2 | TSMV-2       | L              | S14-0591            | 2.1.                            | MH483069              |

|                                     |          |   |                    |                                           |          |
|-------------------------------------|----------|---|--------------------|-------------------------------------------|----------|
| University of Giessen virus-1       | UGV-1    | S | S14-0591           | 2.1.                                      | MH483070 |
| Aurora borealis virus-4             | ABV-4    | L | S14-1477 and -1478 | 2.3. and 2.4 (pool of BIBD pos. snakes)   | MH483071 |
| Keijut pohjoismaissa virus-1        | KePV-1   | L | S14-1477 and -1478 | 2.3. and 2.4 (pool of BIBD pos. snakes)   | MH483072 |
| Peto jauhoksi virus-1               | PJV-1    | L | S14-1477 and -1478 | 2.3. and 2.4 (pool of BIBD pos. snakes)   | MH483073 |
| Suri Vanera virus-2                 | SVaV-2   | L | S14-1477 and -1478 | 2.3. and 2.4 (pool of BIBD pos. snakes)   | MH483074 |
| Tavallinen suomalainen mies virus-1 | TSMV-1   | L | S14-1477 and -1478 | 2.3. and 2.4 (pool of BIBD pos. snakes)   | MH483075 |
| University of Giessen virus-1       | UGV-1    | S | S14-1477 and -1478 | 2.3. and 2.4 (pool of BIBD pos. snakes)   | MH483076 |
| University of Giessen virus-2       | UGV-2    | L | S14-1477 and -1478 | 2.3. and 2.4 (pool of BIBD pos. snakes)   | MH483077 |
| Aurora borealis virus-4             | ABV-4    | L | S15-0040           | 2.5.                                      | MH483078 |
| Keijut pohjoismaissa virus-1        | KePV-1   | L | S15-0040           | 2.5.                                      | MH483079 |
| S segment similar to S5             | S5-like  | S | S15-0040           | 2.5.                                      | MH483080 |
| Suri Vanera virus-2                 | SVaV-2   | L | S15-0040           | 2.5.                                      | MH483081 |
| Tavallinen suomalainen mies virus-1 | TSMV-1   | L | S15-0040           | 2.5.                                      | MH483082 |
| University of Giessen virus-1       | UGV-1    | S | S15-0040           | 2.5.                                      | MH483083 |
| Kuka mitä häh virus-1               | KMHV-1   | L | S17-172            | 2.6.                                      | MH483084 |
| Hipoen jatsoon virus-1              | HJV-1    | L | S17-172            | 2.6.                                      | MH483085 |
| Peto jauhoksi virus-1               | PJV-1    | L | S17-172            | 2.6.                                      | MH483086 |
| Mistä näitä tulee virus-1           | MNTV-1   | L | S17-172            | 2.6.                                      | MH483087 |
| S segment similar to S7             | S7-like  | S | S17-172            | 2.6.                                      | MH483088 |
| Kuka mitä häh virus-1               | KMHV-1   | L | S17-252            | 1.4.                                      | MH483089 |
| Hipoen jatsoon virus-1              | HJV-1    | L | S17-252            | 1.4.                                      | MH503955 |
| Peto jauhoksi virus-1               | PJV-1    | L | S17-252            | 1.4.                                      | MH503956 |
| Kuka mitä häh virus-1               | MNTV-1   | L | S17-252            | 1.4.                                      | MH483090 |
| S segment similar to S10            | S10-like | S | S17-252            | 1.4.                                      | MH503957 |
| Aurora borealis virus-4             | ABV-4    | L | Sn36               | 2.7. (origin of cell culture grown virus) | MH483091 |
| Keijut pohjoismaissa virus-1        | KePV-1   | L | Sn36               | 2.7. (origin of cell culture grown virus) | MH483092 |
| Tavallinen suomalainen mies virus-1 | TSMV-1   | L | Sn36               | 2.7. (origin of cell culture grown virus) | MH483093 |
| University of Giessen virus-1       | UGV-1    | S | Sn36               | 2.7. (origin of cell culture grown virus) | MH483094 |
