# Supplementary material for: Characterization of Haartman Institute snake virus-1 (HISV-1) and HISV-like viruses—The representatives of genus Hartmanivirus, family Arenaviridae
Source: PubMed Central journal article supplement (PMC6261641; doi:10.1371/journal.ppat.1007415), 2018-11-14
Supplement: ppat.1007415.s006.pdf [file ppat.1007415.s006.pdf]

**Supplementary table 2.** Proteomes and amino acid identities between the type species of family *Arenaviridae* genera.

Proteome for the type species of family *Arenaviridae* genera

|                  | Mammarenavirus (LCMV) | Reptarenavirus (GGV) | Hartmanivirus (HISV-1) |
|------------------|-----------------------|----------------------|------------------------|
| <u>GPC</u>       | 498                   | 427                  | 476                    |
| SSP / SP         | 58                    | 23                   | 55 (37)                |
| myristoylation   | yes                   | no                   | yes                    |
| palmitoylation   | no                    | yes: C10, C19        | yes: C34               |
| GP1              | 207                   | 215                  | 191                    |
| GP2              | 233                   | 189                  | 230                    |
| cytoplasmic tail | 42                    | 2                    | 48                     |
| <u>NP</u>        | 558                   | 591                  | 582                    |
| <u>ZP</u>        | 90                    | 116                  | no                     |
| myristoylation   | yes                   | no                   |                        |
| TM helix         | no                    | 13-31                |                        |
| <u>RdRp</u>      | 2210                  | 2066                 | 1958                   |

Amino acid identity based on MAFFT alignment in UGENE

|          | LCMV-GPC | GGV-GPC | HISV-GPC |
|----------|----------|---------|----------|
| LCMV-GPC | 100 %    | 16 %    | 23 %     |
| GGV-GPC  | 16 %     | 100 %   | 22 %     |
| HISV-GPC | 23 %     | 22 %    | 100 %    |

|         | LCMV-NP | GGV-NP | HISV-NP |
|---------|---------|--------|---------|
| LCMV-NP | 100 %   | 32 %   | 21 %    |
| GGV-NP  | 32 %    | 100 %  | 20 %    |
| HISV-NP | 21 %    | 20 %   | 100 %   |

|         | LCMV-ZP | GGV-ZP |
|---------|---------|--------|
| LCMV-ZP | 100 %   | 16 %   |
| GGV-ZP  | 16 %    | 100 %  |

|           | LCMV-RdRp | GGV-RdRp | HISV-RdRp |
|-----------|-----------|----------|-----------|
| LCMV-RdRp | 100 %     | 28 %     | 21 %      |
| GGV-RdRp  | 28 %      | 100 %    | 20 %      |
| HISV-RdRp | 21 %      | 20 %     | 100 %     |
