# Supplementary material for: Characterization of Haartman Institute snake virus-1 (HISV-1) and HISV-like viruses—The representatives of genus Hartmanivirus, family Arenaviridae
Source: PLOS journal article supplement (doi:10.1371/journal.ppat.1007415), 2018-11-14
Supplement: S2 (10.1371/journal.ppat.1007415.s002) [file journal.ppat.1007415.s002]

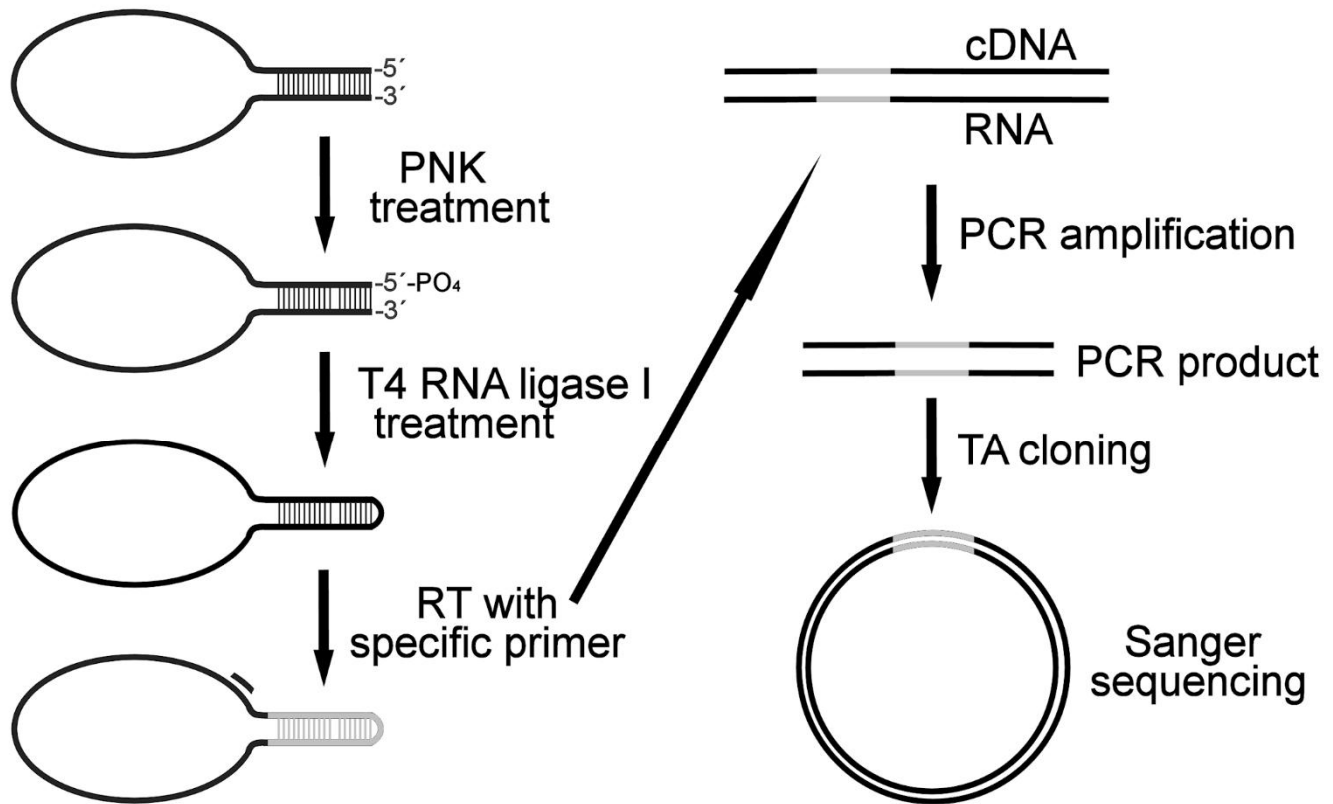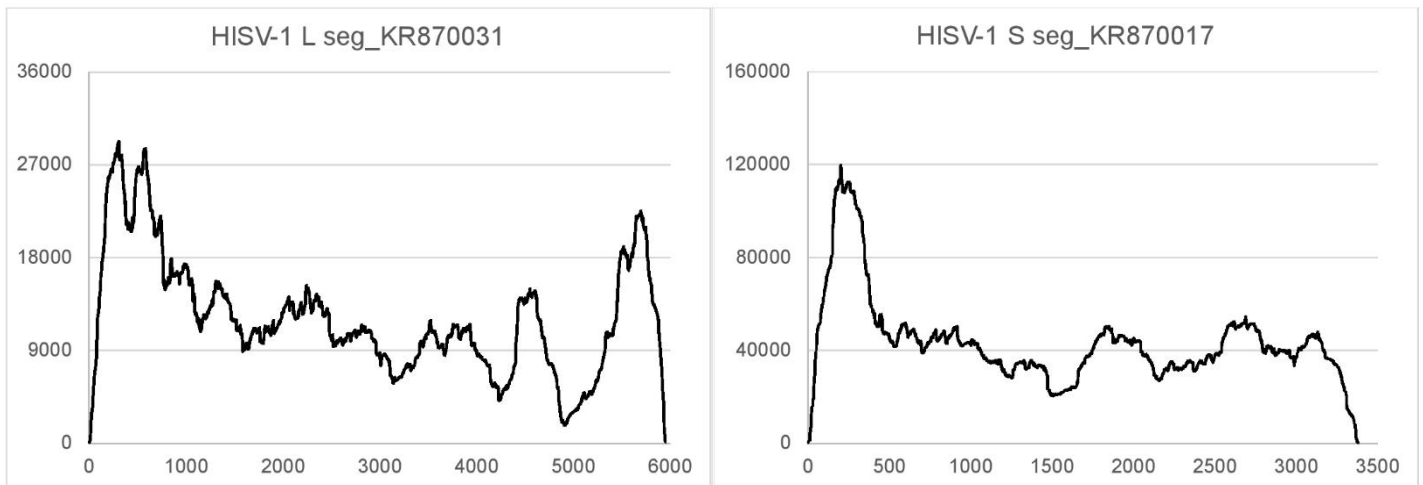

**Supplementary figure 2.** Schematic illustration of the sequencing strategy for HIV-1 genome ends. The viral RNA isolated from cell culture supernatant was treated with polynucleotide kinase (PNK) to ascertain the phosphorylation of 5' end before treatment with T4 RNA ligase I. The ligated RNA was transcribed to cDNA using primer specific for either S or L segment, after which the genome ends were PCR amplified. The PCR products were cloned into a plasmid, and individual clones were Sanger sequenced. The coverage at which HIV-1 L and S segments were sequenced by NGS are shown below. The coverage was obtained by aligning reads to full length S and L segment of HIV-1 by using Bowtie2 in Unipro UGENE v.1.25.0.
